# Supplementary material
Source: PubMed Central journal article supplement (PMC8585489)
Supplement: mmc1.pdf [file mmc1.pdf]

# THE LANCET

## Respiratory Medicine

### Supplementary appendix 1

This appendix formed part of the original submission and has been peer reviewed. We post it as supplied by the authors.

Supplement to: Mazeraud A, Jamme M, Mancusi RL, et al. Intravenous immunoglobulins in patients with COVID-19-associated moderate-to-severe acute respiratory distress syndrome (ICAR): multicentre, double-blind, placebo-controlled, phase 3 trial. *Lancet Respir Med* 2021; published online Nov 11. [http://dx.doi.org/10.1016/S2213-2600\(21\)00440-9](http://dx.doi.org/10.1016/S2213-2600(21)00440-9).

35 **SUPPLEMENTARY MATERIAL**

36 **Table of Contents**

|    |                                                                                           |    |          |
|----|-------------------------------------------------------------------------------------------|----|----------|
| 37 | Appendix 1 : List of Hospitals and Investigators .....                                    | 2  |          |
| 38 | Appendix 2. Supplementary Methods .....                                                   | 6  | a suppri |
| 39 | Berlin criteria for Acute Respiratory Distress Syndrom .....                              | 6  | a suppri |
| 40 | Ventilator-free days (VFD) definition.....                                                | 6  | a suppri |
| 41 | Randomization method .....                                                                | 6  | a suppri |
| 42 | Missing data management .....                                                             | 7  | a suppri |
| 43 | Secondary Outcomes.....                                                                   | 7  | a suppri |
| 44 | Sensitivity analysis.....                                                                 | 7  | a suppri |
| 45 | Supplementary material and methods for the immunological study .....                      | 9  | a suppri |
| 46 | Appendix 3. Supplementary Tables .....                                                    | 10 | a suppri |
| 47 | Table S1. Baseline characteristics (additional data).....                                 | 10 | a suppri |
| 48 | Table S2 – Others secondary outcomes .....                                                | 14 | a suppri |
| 49 | Table S3. Subgroups analysis.....                                                         | 18 | a suppri |
| 50 | Table S4. Unplanned subgroups analysis.....                                               | 19 | a suppri |
| 51 | Table S5: Treatment exposure.....                                                         | 20 | a suppri |
| 52 | Table S6. Intensive Care-related adverse events.....                                      | 21 | a suppri |
| 53 | Table S7. All serious adverse events.....                                                 | 22 | a suppri |
| 54 | Table S8 Cytokines concentrations over time.....                                          | 24 | a suppri |
| 55 | Table S9 Proportion of circulating lymphocytes over time .....                            | 25 | a suppri |
| 56 | Table S10 CONSORT Checklist.....                                                          | 27 | a suppri |
| 57 | Appendix 4. Supplementary Figures .....                                                   | 28 | a suppri |
| 58 | Figure S1. Cumulative inclusions by treatment group.....                                  | 28 | a suppri |
| 59 | Figure S2. Ventilator-free days frequency distribution.....                               | 29 | a suppri |
| 60 | Figure S3. Unadjusted 28 days Odds Ratio: subgroup analysis.....                          | 31 | a suppri |
| 61 | Figure S4. Unadjusted 90 days Odds Ratio: subgroup analysis.....                          | 32 | a suppri |
| 62 | Figure S5. Time to ICU discharge at 28 days (Cumulative incidence plots).....             | 33 | a suppri |
| 63 | Figure S6. Time to ICU discharge at 90 days (Cumulative incidence plots).....             | 34 | a suppri |
| 64 | Figure S7. Time to Hospital discharge at 90 days (Cumulative incidence plots) .....       | 35 | a suppri |
| 65 | Figure S8 : Plasma concentrations of inflammatory cytokines in a subset of patients. .... | 36 | a suppri |
| 66 | Figure S9: Characterization of blood T cells in a subset of patients.....                 | 37 | a suppri |
| 67 | References .....                                                                          | 38 | a suppri |

68

100 **Appendix 1 : List of Hospitals and Investigators**

101

- 102 1. **Groupe Hospitalier Universitaire Paris – Psychiatrie & Neurosciences (GHU Paris) 1,**  
 103 **rue Cabanis 75674 Paris Cedex 14 :** Docteur Aurélien MAZERAUD Investigateur  
 104 Principal Neuroanesthésie Neuroréanimation
- 105 2. **Hôpital Raymond Poincaré 104, boulevard Raymond Poincaré 92380 Garches :**  
 106 Docteur Djillali ANNANE Investigateur Principal Réanimation médico chirurgicale
- 107 3. **Hôpital Pitié Salpêtrière 47 83 Boulevard de l'Hôpital, 75013 Paris :** Docteur Benjamin  
 108 ROHAUT Investigateur Principal Neurologie
- 109 4. **Groupement Hospitalier Edouar Herriot 5, Place d'Arsonval 69437 Lyon Cedex 03 :**  
 110 Docteur Laurent Argaud Investigateur Principal Réanimation médicale
- 111 5. **CHU Saint Antoine 184 Rue du Faubourg Saint Antoine, 75012 Paris :** Docteur Marc  
 112 Garnier Investigateur Principal Anesthésie et Réanimation
- 113 6. **CHU Lariboisiere 2 Rue Ambroise Paré, 75010 Paris :** Docteur Megarbane Bruno  
 114 Investigateur Principal Réanimation Médicale et Toxicologique
- 115 7. **CH Aulnay Boulevard Robert Ballanger, 93600 Aulnay sous Bois :** Docteur François  
 116 Santoli Investigateur Principal Médecine intensive et Réanimation
- 117 8. **CH Chalons en Champagne, 51 Rue du Maréchal Gallieni, 78100 Saint Germain en**  
 118 **Laye :** Docteur Hervé Outin Investigateur Principal Réanimation Polyvalente
- 119 9. **CH Poissy 30 Rue du Maréchal Gallieni, 78100 Saint Germain en Laye :** Docteur Hervé  
 120 OUTIN Investigateur Principal Service de Médecine Intensive Réanimation
- 121 10. **CH Etampes, 26 Avenue Charles De Gaulle, 91150 Etampes :** Docteur Shidasp Siami  
 122 Investigateur Principal Réanimation Polyvalente/Surveillance Continue
- 123 11. **Institut Mutualiste Montsouris, 42 Boulevard Jourdan, 75014 Paris :** Docteur  
 124 Christian Iamer Investigateur Principal Réanimation Polyvalente
- 125 12. **Institut Gustave Roussy, 114 Rue Edouard Vaillant, 94800 Villejuif :** Docteur  
 126 Annabelle Stoclin Investigateur Principal Réanimation USC
- 127 13. **CHU Robert Débré, Rue du Général Koenig, 51100 Reims :** Docteur Bruno  
 128 Mourvillier Investigateur Principal Médecin Polyvalente Intensive Réanimation
- 129 14. **Centre Hospitalier de Dieppe, Avenue Pasteur BP 219, 76200 Dieppe :** Docteur Pierre  
 130 Louis Declerque Investigateur Principal Médecine Intensive Réanimation

- 131 15. **Hôpital de Hautepierre, 1 Avenue Molère, 67098 Strasbourg** : Docteur Julien  
132 Pottecher –Investigateur Principal Service d’Anesthésie Réanimation Chirurgicale
- 133 16. **CHU de Grenoble, CS 10217 38043 Grenoble Cedex 9** : Professeur Carole Scwebel  
134 Investigateur Principal Réanimation Médicale
- 135 17. **CHU Nancy –Brabois, Institut Lorrain du cœur et des vaisseaux Louis Mathieu, rue**  
136 **du Morvan, 54511 Vandoeuvre les Nancy Cedex** : Professeur Marie Reine Losser –  
137 Investigateur principal Service d’Anesthésie Réanimation Chirurgicale
- 138 18. **Grand Hôpital de l’est francilien – site de Jossigny, 2 4 Cours de la Gondoire 77600**  
139 **Jossigny** : Docteur Jonathan Zarka Investigateur Principal Réanimation Médicale
- 140 19. **CHU Amiens, Sud Amiens 80054 Cedex 1** : Professeur Michel Slama Investigateur  
141 Principal Réanimation Médicale
- 142 20. **Hôpital Jaques Cartier, 6 Avenue du Noyer Lambert, 91300 Massy** : Docteur Cyril  
143 Goulenok Investigateur principal Service d’Anesthésie Réanimation Chirurgicale
- 144 21. **Fondation Ophtalmologique Rothschild, 29 rue Manin 75040 Paris Cedex**  
145 **19** : Docteur Pierre Trouiller Investigateur Principal Service d’Anesthésie Réanimation  
146 Chirurgicale
- 147 22. **Hôpital Avicenne, 125 rue de Stalingrad, 93000 Bobigny** : Professeur Stéphane Gaudry  
148 Investigateur Principal Réanimation Médicale
- 149 23. **Anesthésie ORL Pr. Aubrun, Hôpital de la Croix Rousse Novembre 2019 2 Rue**  
150 **Marius Audin 69003 Lyon** : Docteur Mazard Tessa Investigatrice Principale Anesthésie  
151 réanimation
- 152 24. **Service de réanimation médicale Hôpital de Tarbes Boulevard DE LATTRE DE**  
153 **TASSIGNY BP 1330 65013 Tarbes** : Docteur Madeux Benjamin Investigateur Principal  
154 Réanimation médicale
- 155 25. **Service de réanimation à l’Hôpital Nord Franche Comté 100 Route de Moval, 90400**  
156 **Trévenans** : Docteur Moneger Guy Investigateur Principal Réanimation médicale
- 157 26. **Service de Médecine Intensive Réanimation, CHU, 30 Bd. Jean Monnet, 44 093**  
158 **NANTES cedex 1** : Professeur Reignier Jean Investigateur Principal Réanimation  
159 médicale
- 160 27. **Service de réanimation polyvalente, rond point de Girac CS 55015 St Michel**  
161 **Angouleme** : Docteur Schnell David Investigateur Principal Anesthésie réanimation
- 162 28. **Hôpital d’instruction des armées Percy 2 Rue du Lieutenant Raoul Batany, 92140**  
163 **Clamart** : Docteur Rudnicki Stéphane Investigateur Principal Anesthésie réanimation

- 164 29. **Service de Réanimation Médicale. CHR Orléans, 14 avenue de l'Hôpital CS 86709 –**  
165 **45067 Orléans CEDEX 2 – France** : Docteur Muller Grégoir Investigateur Principal
- 166 30. **Service d'anesthésie réanimation, Pôle de Médecine intensive/réanimation Hôpital**  
167 **Salengro Rue Emile Laine CHRU de Lille 59037 Lille Cedex** : Professeur Poissy Julien  
168 Investigateur Principal Service d'anesthésie réanimation
- 169 31. **Hopital de Vannes Réanimation polyvalente 56000 CHBA Vannes** : Docteur Agathe  
170 Delbove Investigatrice Principal Service d'anesthésie réanimation
- 171 32. **CHU Pitié Salpêtrière Service de réanimation chirurgicale (Pr Constantin) 91**  
172 **Boulevard de l'hopital 75012** : Professeur Jean Michel Constantin Investigateur Principal  
173 Service d'anesthésie Réanimation
- 174 33. **CH Valenciennes Avene desandrouin 59300 Valenciennes** : Docteur Fabien Lambiotte  
175 Investigateur Principal Service de réanimation
- 176 34. **Hôpital Robert Boulin 112 rue de la marne 33500 Libourne** : Docteur Aurélie Martin  
177 Investigatrice Principale Service de réanimation
- 178 35. **Groupe Hospitalier Saint Vincent, Strasbourg** : Docteur Thierry Braun Investigateur  
179 Principal Service de réanimation
- 180 36. **Centre hospitalier de Béthune 27 Rue Delbecque, 62660 Beuvry** : Docteur Christophe  
181 Vinsonneau Investigateur Principal Service de réanimation
- 182 37. **CHU Angers Service de réanimation médicale 4 rue Larray 49933 Angers CEDEX** :  
183 Professeur Pierre ASFAR Investigateur Principal Service de Réanimation
- 184 38. **CH Nord Ardennes Service de Réanimation Charleville Mézieres 45 avenue de**  
185 **Manchester 08000 Charleville Mezieres** : Docteur Philippe MATEU Investigateur  
186 Principal Service de Réanimation
- 187 39. **Hopital Jacques Monod Service de Réanimation 29 Avenue Pierre Mendès France,**  
188 **76290 Montivilliers (Havre)** : Docteur Caroline LEMAITRE Investigateur Principal  
189 Service de Réanimation
- 190 40. **Hôpital Paris Saint Joseph 185 Rue Raymond Losserand, 75014 Paris** : Docteur Cédric  
191 Bruel Investigateur Principal Service de réanimation
- 192 41. **Hôpital Européen Georges Pompidou 25 rue Leblanc, 75015 PARIS** : Professeur  
193 DIEHL Jean Luc Investigateur Principal Service de réanimation
- 194 42. **CH Victor Dupouy 69 rue du Lieutenant Colonel Prudhon 95100 Argenteuil** : Docteur  
195 PLANTEFEVE Gaétan Jean Investigateur Principal Réanimation Polyvalente USC
- 196 43. **CHU de Poitiers, 2 rue de la milétrie CS 90577, 86021 Poitiers Cx** : Professeur Arnaud  
197 THILLE Investigateur Principal Service de médecine intensive réanimation



199 **Appendix 2. Supplementary Methods**

200

201 **Berlin criteria for Acute Respiratory Distress Syndrom**

202

- 203
- Acute, meaning onset over 1 week or less
  - Bilateral opacities consistent with pulmonary edema must be present and may be detected on CT or chest radiograph
  - PF ratio <300mmHg with a minimum of 5 cmH<sub>2</sub>O PEEP (or CPAP)
  - “must not be fully explained by cardiac failure or fluid overload,” in the physician’s best estimation using available information — an “objective assessment“ (e.g. echocardiogram) should be performed in most cases if there is no clear cause such as trauma or sepsis.

211 ARDS is categorized as being mild, moderate, or severe according to PaO<sub>2</sub>/FiO<sub>2</sub> on PEEP 5+;  
212 Mild 200 – 300; Moderate 100 – 200; Severe < 100

213

214 **Ventilator-free days (VFD) definition**

215 According to recommendations in Yehya et al.(1), the parameters for the primary objective  
216 calculation are defined as follows:

- 217 – Day 0 (day of randomization)
- 218 – Time frame (28 days)
- 219 – Successful extubation (extubation 48 h without reintubation in a 28 days survivor)
- 220 – Interval reintubations (count from last successful extubation)
- 221 – Death before D28 (VFD = 0)
- 222 – Death after D28 (censor after D28; use D28 ventilation and survival status for  
223 calculating VFDs)
- 224 – Non-invasive support (do not count)
- 225 – Tracheostomy (treat as all invasive ventilation)

226 Therefore, the primary endpoint VFD is defined as follows:

- 227 – VFD = 0 if the patient dies within 28 days after randomization
- 228 – VFD = x if ventilation (including NIV, IMV and ECMO ) time = 28 – x.
- 229 – VFD = 0 if ventilation (including NIV, IMV and ECMO) time ≥ 28.

230

231 **Randomization method**

232 The randomization list was generated by an independent statistician, using R (package  
233 blockrand: “Randomization for Block Random Clinical Trial” - Version 1.5, 2020-04-01[2]).

234 The random block list of sizes two and four and stratified at the center level and time in IMV  
235 (<=12hours, >12 hours- < = 24 hours, >24 - <=72 hours) was uploaded by the study data  
236 manager into the online REDCap eCRF system.

237

238 **Missing data management**

239 For the primary endpoint (VFD)

240 The patients discharged from the Hospital before day 28 after randomization were contacted by  
241 telephone interview regarding their current and past ventilation status on day 28 to complete  
242 information on ventilation status.

243 Given the type of patient and pathology, only two patients were lost to follow-up before day  
244 28. One patient was transferred on the day of randomization to another hospital, and one patient  
245 was discharged on day eight and could not be re-contacted. For both patients, VFDs were  
246 assumed to be equal to zero.

247 For the patient who withdrew consent on day three, VFDs were assumed to be equal to zero as  
248 specified in the SAP.

249 For mortality analysis at 28 and 90 days, patients lost at follow-up or withdrawing was be  
250 censored at the last known alive date.

251 For missing data for the individual SOFA components, the value zero (normal) was assumed  
252 for that component(3).

253 For missing data for one of the four components of the lung injury score, it was considered 0,  
254 and the mean was realized(4).

255 No imputation was carried out for missing data. For each parameter assessed both at baseline  
256 and subsequent visits, the missing data by the experimental group are reported in Table S1 and  
257 Table S2.

258

259 **Efficacy Analysis**

260 In the SAP, the COX model was planned to verify the differential risk of death at 28 and 90  
261 days between the two experimental arms; verification by log-log plot revealed that the  
262 requirements were not met. Therefore, the unadjusted Odds Ratios was used to assess the risk  
263 of in-hospital death.

264 In addition, the adjusted ORs for the following risk factors at baseline were estimated: age  $\leq 65$   
265 years  $> 65$  years, sex, and BMI  $\geq 30$  and  $< 30$  using the logistic model.

266

267 **Secondary Outcomes**

268 Prespecified secondary outcomes such as ccomplement system study, bronchoalveolar lavage  
269 study, medical research council sum score y or serial biological markers or day 3  
270 outcometimepoints that were prespecified couldare not be presentedshown due to missingness.

271

272 **Sensitivity analysis**

273 In order to confirm the obtained results in the ITT analysis, both the main objective and the  
274 competing risks (mortality at 28 days and days on mechanical ventilation) were verified on the  
275 per-protocol population.



276 The population per-protocol was identified according to the following criteria:

277 – administered dose intensity =100% ±5%.

278 – start of experimental treatment no later than the second day after randomization.

279 No other protocol deviations were found. For the main objective and competing risks, we had  
280 no missing data.

### 281 **Subgroup Analysis**

282 For HRs in the subgroup analysis, the significance of the interaction was tested with the method  
283 proposed by Altman & Bland 2003 (5).

284

### 285 **Statistical Analysis**

286 All statistical analyses were performed on the intention-to-treat population.

287 All descriptive analyses, statistical tests on means, medians, and frequencies, as well as  
288 analyses of survival data and Cox models, were performed with SPSS (IBM, Version 26.0.  
289 Armonk, NY).

290 The following RStudio(Version 1.3.1093) packages have been used for the graphs:

- 291 • ggplot2
- 292 • survival
- 293 • survminer

294 For the primary objective (Ventilator Free days), the Clustered Wilcoxon rank-sum test  
295 (Rosner-Glynn-Lee method) stratified by center and IMV duration was estimated with the  
296 RStudio (Version 1.3.1093) “clusrank” package, the script used is reported below.

```
## Clustered signed rank test using RGL method.
```

```
Library(clusrank)
```

```
clusWilcox.test(VFDays ~ Treatment + cluster(center) + stratum(strate_rando), data = icar_wilcox,  
method = "rgl")
```

297

298 **Supplementary material and methods for the immunological study**

299 ***Fluorescence staining and flow cytometry***

300 The following monoclonal antibodies were used in this study: CD3-allophycocyanin-H7 (clone  
301 SK7, dilution factor: 1/20); CD4-Pacific Blue (clone RPA-T4, 1/40); CD8-Brilliant Violet 650  
302 (clone SK1, 1/50); CD25-PE-Cyanine7 (clone M-A251, 1/10); CD45RA-Brilliant Violet 711  
303 (clone HI 100, 1/40), and  $\gamma\delta$  TCR-PerCP-Cyanine5.5 (clone B1, 1/10) from BD Biosciences;  
304 CD127-allophycocyanin (clone REA614, 1/20) from Miltenyi Biotec. In all experiments, the  
305 Live/Dead blue Dye (Invitrogen) was used to exclude dead cells. Frozen PBMCs were  
306 incubated during 10 min in RPMI 1640 Glutamax (Gibco) supplemented with 5% FCS  
307 (Biochrom) warmed up to 37 °C then washed in PBS. Cell suspensions were collected and  
308 dispensed into 96-well round-bottom microtiter plates (Greiner Bioscience;  $2 \times 10^6$  cells/well).  
309 PBMCs were washed and incubated for 30 min at +4 °C with Live/Dead blue dye in PBS. Five  
310 percent (vol/vol) heat-inactivated human AB serum (Abcys) was added for an extra 15 min at  
311 +4 °C. Next, cells were labeled for 30 min at +4 °C with antibodies diluted in PBS with 5%  
312 FCS (Biochrom) and 0.1% NaN<sub>3</sub> (Sigma-Aldrich) PBS. Cells were then washed, fixed with  
313 2% paraformaldehyde, and events acquired using BD Fortessa flow cytometer (BD  
314 Biosciences). List-mode data files were analyzed using Diva software (BD Biosciences). Data  
315 acquisition was performed on the Cochin Cytometry and Immunobiology (CYBIO) facility

316 ***Analysis of cytokine and chemokine plasma concentrations***

317 A multiplex cytokine immunoassay panel was used to quantify plasma concentrations of  
318 interleukin 6, interleukin 13 and of tumor necrosis factor  $\alpha$  (MesoScale Discovery, Rockville,  
319 Maryland, USA). A standard curve was generated for each set of reagents. The minimum and  
320 maximum detection limits depend on the cytokines and chemokines and all of them were in the  
321 detection range. Quantification was performed using Workbench4.0 (MesoScale Discovery).

322

323

324

325 **Appendix 3. Supplementary Tables**  
 326

327 **Table S1. Baseline characteristics (additional data)**  
 328

|                                                                                                                                                                  | <b>Intravenous Immunoglobulins (No. 69)</b> | <b>Placebo (No. 77)</b>           | <b>Missing Value</b> |                |
|------------------------------------------------------------------------------------------------------------------------------------------------------------------|---------------------------------------------|-----------------------------------|----------------------|----------------|
|                                                                                                                                                                  | <b>mean (SD)<br/>median [IQR]</b>           | <b>mean (SD)<br/>median [IQR]</b> | <b>IVI<br/>G</b>     | <b>Placebo</b> |
| <b>Demographic and comorbidities</b>                                                                                                                             |                                             |                                   |                      |                |
| Body Mass Index (kg/m <sup>2</sup> )                                                                                                                             |                                             |                                   | -                    | -              |
| Underweight (below 18.5) No. (%)                                                                                                                                 | 0 (0)                                       | 0 (0)                             |                      |                |
| Healthy weight (18.5 to 24.9) No. (%)                                                                                                                            | 9 (13)                                      | 12 (16)                           |                      |                |
| Overweight (25.0 to 29.9) No. (%)                                                                                                                                | 22 (32)                                     | 33 (43)                           |                      |                |
| Obesity (30 or higher) No. (%)                                                                                                                                   | 34 (49)                                     | 26 (34)                           |                      |                |
| Class 3 Obesity (40 or higher) No. (%)                                                                                                                           | 4 (6)                                       | 6 (8)                             |                      |                |
| Charlson Comorbidity Index (CCI) median [IQR]                                                                                                                    | 3 [1-4]                                     | 3 [2-4]                           | -                    | -              |
| No comorbidity (CCI = 0) No. (%)                                                                                                                                 | 8 (12)                                      | 2 (3)                             |                      |                |
| Moderate comorbidity (CCI = 1-5) No. (%)                                                                                                                         | 56 (81)                                     | 70 (91)                           |                      |                |
| Severe comorbidity (CCI >5) No. (%)                                                                                                                              | 5 (7)                                       | 5 (7)                             |                      |                |
| Treated for hypertension No. (%)                                                                                                                                 | 36 (52)                                     | 35 (46)                           | -                    | -              |
| Smoking No. (%)                                                                                                                                                  | 2 (3)                                       | 4 (5)                             | -                    | -              |
| WHO Performance status No. (%)                                                                                                                                   |                                             |                                   | 8                    | 8              |
| Fully active, able to carry on all pre-disease performance without restriction No. (%)                                                                           | 45 (74)                                     | 60 (87)                           |                      |                |
| Restricted in physically strenuous activity but ambulatory and able to carry out work of a light or sedentary nature, e.g., light housework, office work No. (%) | 11 (18)                                     | 4 (6)                             |                      |                |
| Ambulatory and capable of all self-care but unable to carry out any work activities. Up and about more than 50% of waking hours No. (%)                          | 3 (5)                                       | 4 (6)                             |                      |                |
| Capable of only limited self-care, confined to bed or chair more than 50% of waking hours No. (%)                                                                | 1 (2)                                       | -                                 |                      |                |
| Completely disabled; cannot carry on any self-care; totally confined to bed or chair No. (%)                                                                     | 1 (2)                                       | 1 (2)                             |                      |                |
| <b>Covid-19 course</b>                                                                                                                                           |                                             |                                   |                      |                |
| Time from symptom onset to ICU admission (days)                                                                                                                  | 9.4 (6.84)<br>8.0 [6.0-11.0]                | 9.3 (6.70)<br>8.0 [6.0-12.5]      | -                    | 3              |
| Time from symptom onset to endotracheal intubation (days)                                                                                                        | 2.3 (2.4)<br>1.0 [1.0-3.0]                  | 1.7 (1.5)<br>1.0 [1.0-2.0]        | -                    | -              |

|                                                                                           | Intravenous Immunoglobulins (No. 69) | Placebo (No. 77)                    | Missing Value |         |
|-------------------------------------------------------------------------------------------|--------------------------------------|-------------------------------------|---------------|---------|
|                                                                                           | mean (SD)<br>median [IQR]            | mean (SD)<br>median [IQR]           | IVI<br>G      | Placebo |
| Time between initiation of invasive mechanical ventilation and randomization –no. (%)     |                                      |                                     | -             | -       |
| ≤12 hours                                                                                 | 23 (33)                              | 31 (40)                             |               |         |
| >12 ≤24 hours                                                                             | 23 (33)                              | 23 (30)                             |               |         |
| >24 ≤72 hours                                                                             | 23 (33)                              | 23 (30)                             |               |         |
| Simplified Acute Physiology Score II ø                                                    | 41.2 (12.3)<br>41.0 [32.0-50.0]      | 40.4 (11.6)<br>39.0 [31.5-50.0]     | -             | -       |
| <b>Critical illness and acute respiratory distress syndrome severity at randomization</b> |                                      |                                     |               |         |
| Sequential organ Failure Assessment score at randomization ††<br>median [IQR]             | 6.0 [4.0-8.0]                        | 6.0 [3.0-8.0]                       | 1             | -       |
| 2-3                                                                                       | 12 (18)                              | 20 (26)                             |               |         |
| 4-5                                                                                       | 20 (29)                              | 16 (21)                             |               |         |
| 6-7                                                                                       | 17 (25)                              | 13 (17)                             |               |         |
| 8-9                                                                                       | 13 (19)                              | 17 (22)                             |               |         |
| 10-11                                                                                     | 1 (2)                                | 3 (4)                               |               |         |
| 12-14                                                                                     | 5 (7)                                | 8 (10)                              |               |         |
| Kidney disease improving global outcome score median (IQR)                                | 0 [0-0]                              | 0 [0-0]                             | -             | -       |
| Vasopressor support No. (%)                                                               | 36 (52)                              | 35 (46)                             | -             | -       |
| Lung injury score†                                                                        | 3.0 (0.54)<br>3.0 [2.7-3.3]          | 3.1 (0.52)<br>3.0 [3.0-3.5]         | 1             | -       |
| PaO <sub>2</sub> :FiO <sub>2</sub>                                                        | 128.7 (45.48)<br>124.0 [96.0-154.8]  | 119.0 (49.18)<br>110.0 [80.0-152.0] | 1             | 2       |
| Lung compliance (mL/cm H <sub>2</sub> O)                                                  | 31.8 (10.84)<br>32 [25-39]           | 27.9 (11.0)<br>28 [23-36]           | 14            | 14      |
| Radiological Score: Number of quadrant(s) with alveoli-interstitial opacities No. (%)     |                                      |                                     | 32            | 37      |
| Median [IQR]                                                                              | 4 [2-4]                              | 4 [3-4]                             |               |         |
| 1 no. (%)                                                                                 | 2 (5)                                | -                                   |               |         |
| 2 no. (%)                                                                                 | 9 (22)                               | 6 (12)                              |               |         |
| 3 no. (%)                                                                                 | 5 (12)                               | 9 (18)                              |               |         |

|                                                                          | Intravenous Immunoglobulins (No. 69) | Placebo (No. 77)                 | Missing Value |         |
|--------------------------------------------------------------------------|--------------------------------------|----------------------------------|---------------|---------|
|                                                                          | mean (SD)<br>median [IQR]            | mean (SD)<br>median [IQR]        | IVI<br>G      | Placebo |
| 4 no. (%)                                                                | 25 (61)                              | 35 (69)                          |               |         |
| None no. (%)                                                             | -                                    | 1 (2)                            |               |         |
| Pulmonary embolia no. (%)                                                | 5 (8)                                | 7 (11)                           | 3             | 11      |
| % of pulmonary impairment                                                | 57.7 (19.89)<br>63.0 [40.0-75.0]     | 52.7 (21.38)<br>50.0 [31.5-75.0] | 56            | 60      |
| <b>Acute respiratory distress syndrome management</b>                    |                                      |                                  |               |         |
| Tidal volume, ml/kg of predicted body weight                             | 6.2 (0.87)<br>6.2 [5.6-6.7]          | 6.2 (0.84)<br>6.2 [5.8-6.6]      | 7             | 4       |
| Positive end expiratory pressure – cm H <sub>2</sub> O                   | 12.0 (3.5)<br>12.0 [9.8-14.0]        | 11.8 (2.7)<br>12.0 [10.0-14.0]   | 11            | 11      |
| Inspiratory plateau pressure – cm H <sub>2</sub> O                       | 24.5 (4.7)<br>24 [22-28]             | 24.9 (4.32)<br>25 [22-28]        | 11            | 13      |
| <b>Covid-19 treatment before and two days after syndrome management*</b> |                                      |                                  |               |         |
| Corticosteroids No. (%)                                                  | 49 (71)                              | 55 (71)                          |               |         |
| Hydroxychloroquine (HCQ) No. (%)                                         | 8 (12)                               | 4 (5)                            |               |         |
| Antiretroviral therapy No. (%)                                           | 12 (17)                              | 9 (12)                           |               |         |
| Tocilizumab (anti IL6) No. (%)                                           | 5 (7)                                | 7 (9)                            |               |         |
| Antibiotics therapy No. (%)                                              | 56 (81)                              | 65 (84)                          |               |         |
| Non-invasive ventilation No. (%)                                         | 46 (67)                              | 36 (47)                          |               |         |
| High Flow Nasal Oxygen Therapy No. (%)                                   | 4 (6)                                | 10 (13)                          |               |         |
| Awake prone positioning No. (%)                                          | 20 (29)                              | 13(17)                           |               |         |
| <b>Laboratory value</b>                                                  |                                      |                                  |               |         |
| Leucocytes (G/L)                                                         | 9.7 (6.05)<br>9.1 [6.3-11.8]         | 9.8 (4.74)<br>9.6 [7.1-11.9]     | 5             | 8       |
| Lymphocytes count (x10 <sup>9</sup> /L)                                  | 1.1 (1.7)<br>0.8 [0.5-1.1]           | 0.9 (1.2)<br>0.6 [0.4-0.9]       | 16            | 16      |
| Creatinine (micromol/L)                                                  | 104.4 (138.5)<br>77 [58-100]         | 92.3 (60.9)<br>72 [60-103]       | 4             | 5       |
| d-dimers (microgrammes/L)                                                | 2545 (3374)<br>1290 [899-2290]       | 2928 (3405)<br>1883 [954-3317]   | 32            | 33      |

|                                                                                                                                                                                                                                                                                                                                                                                                                                                                                                                                                                                                                                                                                                                        | Intravenous Immunoglobulins (No. 69) | Placebo (No. 77)                   | Missing Value |         |
|------------------------------------------------------------------------------------------------------------------------------------------------------------------------------------------------------------------------------------------------------------------------------------------------------------------------------------------------------------------------------------------------------------------------------------------------------------------------------------------------------------------------------------------------------------------------------------------------------------------------------------------------------------------------------------------------------------------------|--------------------------------------|------------------------------------|---------------|---------|
|                                                                                                                                                                                                                                                                                                                                                                                                                                                                                                                                                                                                                                                                                                                        | mean (SD)<br>median [IQR]            | mean (SD)<br>median [IQR]          | IVI<br>G      | Placebo |
| C-Reactive Protein (mg/L)                                                                                                                                                                                                                                                                                                                                                                                                                                                                                                                                                                                                                                                                                              | 167.1 (82.6)<br>181.0 [95.5-219.8]   | 157.6 (91.8)<br>132.5 [85.0-216.5] | 25            | 23      |
| Platelet count (x10 <sup>9</sup> /L)                                                                                                                                                                                                                                                                                                                                                                                                                                                                                                                                                                                                                                                                                   | 292 (135.8)<br>263 [197-348]         | 252 (108.7)<br>270 [217-335]       | 7             | 9       |
| <p>IVIG : Intravenous Immunoglobulins, CI : Confidence interval, IQR : Interquartile Range ; WHO : World Health Organisation, ICU : Intensive Care Unit.<br/> †† In case of missing data for one SOFA components, the value of 0 (normal) was assumed;<br/> † For missing data for one of the 4 component of the lung injury score, it was considered to be 0, and the mean was realized;<br/> <i>f</i> FiO<sub>2</sub> denotes the fraction of inspired oxygen and PaO<sub>2</sub> the partial pressure of arterial oxygen in mmHg.<br/> ∅ Scores on the Simplified Acute physiological Score II range from 0 to 163, with higher scores indicating greater severity of illness.<br/> * multiple choice question;</p> |                                      |                                    |               |         |

329

330

331

332 **Table S2 – Others secondary outcomes**

333

| Outcomes                                     | Intravenous immunoglobulins (No. 69)             | Placebo (No. 77)                                | Difference (95% CI)                                               | Missing Value |         |
|----------------------------------------------|--------------------------------------------------|-------------------------------------------------|-------------------------------------------------------------------|---------------|---------|
|                                              |                                                  |                                                 |                                                                   | IVIG          | Placebo |
| Death at 28 days – no. (%)                   | 24 (34.8)                                        | 20 (26.0)                                       | <b>Adjusted OR (95% CI)<sup>o</sup></b><br>1.65<br>(0.78 to 3.49) |               |         |
| Death at day 90 – no. (%)                    | 28 (40.6)                                        | 31 (40.3)                                       | <b>Adjusted OR (95% CI)</b><br>1.08<br>(0.54 to 2.18)             |               |         |
| <b>Sequential Organ Failure Assessment §</b> |                                                  |                                                 |                                                                   |               |         |
| 24 hours<br>Median [IQR]                     | 7 [7 to 10]                                      | 7 [6 to 8]                                      |                                                                   |               |         |
| No. of patients                              | 62                                               | 73                                              |                                                                   | 6             | 3       |
| Day 7<br>Median [IQR]                        | 5 [3 to 8]                                       | 5 [3 to 8]                                      |                                                                   |               |         |
| No. of patients                              | 56                                               | 56                                              |                                                                   | 4             | 9       |
| Day 14<br>Median [IQR]                       | 7 [4 to 10]                                      | 7 [4 to 8]                                      |                                                                   |               |         |
| No. of patients                              | 37                                               | 42                                              |                                                                   | 6             | 7       |
| Day 21<br>Median [IQR]                       | 6 [3 to 10]                                      | 6 [4 to 8]                                      |                                                                   |               |         |
| No of patients                               | 21                                               | 31                                              |                                                                   | 7             | 8       |
| Day 28<br>Median [IQR]                       | 7 [3 to 10]                                      | 6 [4 to 10]                                     |                                                                   |               |         |
| No. of patients                              | 16                                               | 23                                              |                                                                   | -             | 7       |
| <b>Lung compliance</b>                       |                                                  |                                                 |                                                                   |               |         |
| 24 hours<br>Mean (95%CI)<br>Median [IQR]     | 34.0 (30.2 to 37.8)<br>32.0 [22.0 to 46.0]       | 31.6 (28.3 to 34.9)<br>30.0 [22.8 to 39.3]      | 2.5 (-2.5 to 7.4)                                                 |               |         |
| No. of patients                              | 47                                               | 58                                              |                                                                   | 21            | 18      |
| Day 7<br>Mean (95%CI)<br>Median [IQR]        | 31.5 (27.1 to 35.9)<br>30.0 [21.3 to 38.0]       | 31.3 (27.3 to 35.3)<br>30.0 [24.0 to 38.0]      | 0.21 (-5.7 to 6.1)                                                |               |         |
| No. of patients                              | 36                                               | 35                                              |                                                                   | 24            | 30      |
| Day 14<br>Mean (95%CI)<br>Median [IQR]       | 23.6 (19.1 to 28.1)<br>22.0 [16.0 to 30.0]       | 32.0 (25.5 to 38.5)<br>30.0 [22.0 to 35.5]      | -8.5 (-6.3 to -0.7)                                               |               |         |
| No. of patients                              | 23                                               | 25                                              |                                                                   | 20            | 24      |
| Day 21<br>Mean (95%CI)<br>Median [IQR]       | 20.8 (13.6 to 28.1)<br>19.0 [11.0 to 31.0]       | 24.2 (17.8 to 30.6)<br>21.0 [17.0 to 32.5]      | -3.3 (-12.4 to 5.7)                                               |               |         |
| No of patients                               | 11                                               | 13                                              |                                                                   | 17            | 26      |
| Day 28<br>Mean (95%CI)<br>Median [IQR]       | 22.8 (7.0 to 38.6)<br>19.5 [12.3 to 30.3]        | 27.8 (19.0 to 36.5)<br>24.0 [14.0 to 42.5]      | -4.9 (-21.0 to 11.9)                                              |               |         |
| No. of patients                              | 6                                                | 16                                              |                                                                   | 10            | 14      |
| <b>PaO<sub>2</sub>/FiO<sub>2</sub> Ratio</b> |                                                  |                                                 |                                                                   |               |         |
| 24 hours<br>Mean (95%CI)<br>Median [IQR]     | 151.8 (124.3 to 179.3)<br>135.0 [101.5 to 172.0] | 143.0 (128.6 to 157.4)<br>135.0 [97.0 to 177.0] | 8.8 (-20.7 to 38.3)                                               |               |         |
| No. of patients                              | 61                                               | 71                                              |                                                                   | 7             | 5       |
| Day 7                                        |                                                  |                                                 |                                                                   |               |         |

| Outcomes                         | Intravenous immunoglobulins (No. 69) | Placebo (No. 77)       | Difference (95% CI)   | Missing Value |         |
|----------------------------------|--------------------------------------|------------------------|-----------------------|---------------|---------|
|                                  |                                      |                        |                       | IVIG          | Placebo |
| Mean (95%CI)                     | 170.0 (141.0 to 198.8)               | 175.4 (146.8 to 204.0) | -5.5 (-45.6 to 34.7)  |               |         |
| Median [IQR]                     | 154.0 [115.0 to 194.0]               | 153.0 [112.0 to 215.0] |                       |               |         |
| No. of patients                  | 55                                   | 55                     |                       | 5             | 10      |
| Day 14                           |                                      |                        |                       |               |         |
| Mean (95%CI)                     | 160.2 (136.2 to 184.3)               | 169.3 (142.5 to 196.1) | -9.1 (-45.2 to 27.0)  |               |         |
| Median [IQR]                     | 151.0 [98.0 to 222.0]                | 148.5 [103.3 to 205.5] |                       |               |         |
| No. of patients                  | 35                                   | 42                     |                       | 8             | 7       |
| Day 21                           |                                      |                        |                       |               |         |
| Mean (95%CI)                     | 172.4 (140.8 to 204.1)               | 183.2 (153.1 to 213.2) | -10.7 (-54.6 to 33.1) |               |         |
| Median [IQR]                     | 177.0 [113.0 to 215.0]               | 182.0 [101.0 to 248.0] |                       |               |         |
| No of patients                   | 21                                   | 31                     |                       | 7             | 8       |
| Day 28                           |                                      |                        |                       |               |         |
| Mean (95%CI)                     | 150.7 (112.3 to 189.1)               | 152.1 (116.2 to 188.0) | -1.41(-54.4 to 51.6)  |               |         |
| Median [IQR]                     | 142.0 [108.0 to 175.0]               | 145.0 [70.5 to 219.0]  |                       |               |         |
| No of patients                   | 15                                   | 24                     |                       | 1             | 6       |
| <b>Lung injury score</b>         |                                      |                        |                       |               |         |
| 24 hours Median [IQR]            | 3.0 [2.5-3.2]                        | 3.1 [3.0-3.5]          |                       |               |         |
| No. of patients                  | 68                                   | 76                     |                       | 1             | 1       |
| Day 7 Median [IQR]               | 2.7 [2.0 -3.0]                       | 2.8 [2.1 -3.3]         |                       |               |         |
| No. of patients                  | 58                                   | 57                     |                       | 2             | 8       |
| Day 14 Median [IQR]              | 2.7 [2.0 – 3.3]                      | 2.7 [2.3 - 3.3]        |                       |               |         |
| No. of patients                  | 38                                   | 42                     |                       | 5             | 7       |
| Day 21 Median [IQR]              | 2.0 [2.0 – 3.0]                      | 2.4 [1.5 -3.0]         |                       |               |         |
| No. of patients                  | 26                                   | 32                     |                       | 2             | 7       |
| Day 28 Median [IQR]              | 2.5 [1.9 -3.1]                       | 2.7 [2.0 – 3.3]        |                       |               |         |
| No. of patients                  | 18                                   | 28                     |                       | -             | 2       |
| <b>Lung radiological score</b>   |                                      |                        |                       |               |         |
| 24 hours Median [IQR]            | 4 [2 to 4]                           | 4 [3 to 4]             |                       |               |         |
| No. of patients                  | 24                                   | 34                     |                       | 44            | 42      |
| Day 7 Median [IQR]               | 4 [2 to 4]                           | 4 [2.5 to 4]           |                       |               |         |
| No. of patients                  | 17                                   | 25                     |                       | 43            | 40      |
| Day 14 Median [IQR]              | 4 [3 to 4]                           | 4 [4 to 4]             |                       |               |         |
| No. of patients                  | 10                                   | 17                     |                       | 33            | 32      |
| Day 21 Median [IQR]              | 2.5 [2.0 to 3.3]                     | 3 [1 to 4]             |                       |               |         |
| No of patients                   | 6                                    | 15                     |                       | 22            | 24      |
| Day 28 Median [IQR]              | 2 [1 to 4]                           | 4 [3 to 4]             |                       |               |         |
| No. of patients                  | 7                                    | 14                     |                       | 9             | 16      |
| <b>C-reactive protein (mg/L)</b> |                                      |                        |                       |               |         |
| 24 hours                         |                                      |                        |                       |               |         |
| Mean (95%CI)                     | 157.4 (122.0 to 192.8)               | 143.8 (114.3 to 173.9) | 13.6 (-31.7 to 58.9)  |               |         |
| Median [IQR]                     | 128.0 [59.0 to 246.0]                | 119.0 [60.5 to 223.0]  |                       |               |         |
| No. of patients                  | 23                                   | 31                     |                       | 45            | 45      |
| Day 7                            |                                      |                        |                       |               |         |
| Mean (95%CI)                     | 123.2 (86.7 to 159.8)                | 116.8 (79.5 to 154.1)  | 6.5 [-44.8 to 57.8]   |               |         |
| Median [IQR]                     | 73 [26 to 193]                       | 65 [30 to 222]         |                       |               |         |



| Outcomes                                                          | Intravenous immunoglobulins (No. 69) | Placebo (No. 77)       | Difference (95% CI)   | Missing Value |         |
|-------------------------------------------------------------------|--------------------------------------|------------------------|-----------------------|---------------|---------|
|                                                                   |                                      |                        |                       | IVIG          | Placebo |
| No. of patients                                                   | 37                                   | 35                     |                       | 23            | 30      |
| Day 14                                                            |                                      |                        |                       |               |         |
| Mean (95%CI)                                                      | 163.1 (115.8 to 210.4)               | 161.2 (124.2 to 198.1) | 1.9 (56.9 to 60.7)    |               |         |
| Median [IQR]                                                      | 169.0 [33 to 264]                    | 139.5 [103 to 234]     |                       |               |         |
| No. of patients                                                   | 25                                   | 24                     |                       | 18            | 25      |
| Day 21                                                            |                                      |                        |                       |               |         |
| Mean (95%CI)                                                      | 108.9 (64.7 to 153.2)                | 127.7 (71.1 to 184.3)  | -18.8 (-89.2 to 51.7) |               |         |
| Median [IQR]                                                      | 65.5 [37.8 to 193.8]                 | 107 [53 to 153]        |                       |               |         |
| No of patients                                                    | 18                                   | 20                     |                       | 10            | 19      |
| Day 28                                                            |                                      |                        |                       |               |         |
| Mean (95%CI)                                                      | 94.5 (11.3 to 177.7)                 | 141.1 (93.3 to 188.8)  | -46.1 (-136 to 44)    |               |         |
| Median [IQR]                                                      | 23 [8 to 94]                         | 123 [81 to 201]        |                       |               |         |
| No of patients                                                    | 15                                   | 16                     |                       | 1             | 14      |
| Procalcitonin PCT (ng/mL)                                         |                                      |                        |                       |               |         |
| 24 hours                                                          |                                      |                        |                       |               |         |
| Mean (95%CI)                                                      | 1.7 (0.5 to 2.9)                     | 0.7 (0.4 to 1.1)       | 0.6 (0.3 to 2.3)      |               |         |
| Median [IQR]                                                      | 0.3 [0.2 to 0.7]                     | 0.2 [0.1 to 0.9]       |                       |               |         |
| No. of patients                                                   | 37                                   | 36                     |                       | 31            | 45      |
| Day 7                                                             |                                      |                        |                       |               |         |
| Mean (95%CI)                                                      | 4.6 (0 to 11.3)                      | 0.7 (0 to 1.5)         | 3.9 (-2.8 to 10.6)    |               |         |
| Median [IQR]                                                      | 0.2 [0.1 to 0.9]                     | 0.2 [0.1 to 0.5]       |                       |               |         |
| No. of patients                                                   | 28                                   | 29                     |                       | 23            | 30      |
| Day 14                                                            |                                      |                        |                       |               |         |
| Mean (95%CI)                                                      | 8.4 (0 to 22.7)                      | 1.0 (0 to 2.0)         | 7.4 (-4.5 to 19.3)    |               |         |
| Median [IQR]                                                      | 0.7 [0.3 to 3.1]                     | 0.4 [0.2 to 0.9]       |                       |               |         |
| No. of patients                                                   | 18                                   | 24                     |                       | 18            | 25      |
| Day 21                                                            |                                      |                        |                       |               |         |
| Mean (95%CI)                                                      | 3.5 (0 to 9.4)                       | 0.8 (0.1 to 1.5)       | 2.7 (-3.1 to 8.6)     |               |         |
| Median [IQR]                                                      | 0.4 [0.1 to 1.6]                     | 0.3 [0.2 to 0.9]       |                       |               |         |
| No of patients                                                    | 14                                   | 17                     |                       | 10            | 19      |
| Day 28                                                            |                                      |                        |                       |               |         |
| Mean (95%CI)                                                      | 7.7 (0 to 23.5)                      | 2.7 (0.0 to 5.4)       | 5.0 [-9.9 to 19.9]    |               |         |
| Median [IQR]                                                      | 0.3 [0.1 to 1.7]                     | 0.5 [0.2 to 5.1]       |                       |               |         |
| No of patients                                                    | 15                                   | 16                     |                       | 1             | 14      |
| Functional Status                                                 |                                      |                        |                       |               |         |
| WHO score at 28 days $\alpha$                                     |                                      |                        |                       |               |         |
| Median [IQR]                                                      | 3 [1 to 5]                           | 3 [1 to 7]             |                       | 1             | 4       |
| No of patients                                                    | 43                                   | 52                     |                       |               |         |
| Discharge at home no. (%)                                         | 16 (37)                              | 19 (37)                |                       |               |         |
| Discharged home but on oxygen or with activity limitation no. (%) | -                                    | 1 (2)                  |                       |               |         |
| Hospitalized without oxygen no. (%)                               | 6 (14)                               | 7 (13)                 |                       |               |         |
| Hospitalized on oxygen with nasal canula or single mask no. (%)   | 9 (21)                               | 6 (11)                 |                       |               |         |
| Non-invasive ventilation no. (%)                                  | 2 (5)                                | 1 (2)                  |                       |               |         |
| High flow oxygen therapy ( Optiflow) no. (%)                      | 1 (2)                                | -                      |                       |               |         |
| Invasive mechanical ventilation no. (%)                           | 7 (16)                               | 13 (25)                |                       |               |         |
| Invasive ventilation and vasopressor or dialysis or ECMO no. (%)  | 2 (5)                                | 5 (10)                 |                       |               |         |
| WHO score at 90 days $\alpha$                                     |                                      |                        |                       |               |         |
| Median [IQR]                                                      | 1 [1 to 2]                           | 1 [1 to 1]             |                       | 1             | 1       |

| Outcomes                                                          | Intravenous immunoglobulins (No. 69) | Placebo (No. 77)    | Difference (95% CI) | Missing Value |         |
|-------------------------------------------------------------------|--------------------------------------|---------------------|---------------------|---------------|---------|
|                                                                   |                                      |                     |                     | IVIG          | Placebo |
| No of patients                                                    | 39                                   | 44                  |                     |               |         |
| Discharge at home no. (%)                                         | 28 (72)                              | 35 (79)             |                     |               |         |
| Discharged home but on oxygen or with activity limitation no. (%) | 2 (5)                                | 1 (2)               |                     |               |         |
| Hospitalized without oxygen no. (%)                               | 6 (15)                               | 4 (9)               |                     |               |         |
| Hospitalized on oxygen with goggles or single mask no. (%)        | 2 (5)                                | 1 (2)               |                     |               |         |
| Non-invasive ventilation no. (%)                                  | -                                    | 2 (5)               |                     |               |         |
| High flow oxygen therapy (Optiflow) no. (%)                       | -                                    | -                   |                     |               |         |
| Invasive mechanical ventilation no. (%)                           | 1 (3)                                | 1 (2)               |                     |               |         |
| Invasive ventilation and vasopressor or dialysis or ECMO no. (%)  | -                                    | -                   |                     |               |         |
| ICU length of stay <sup>□</sup> (days)                            |                                      |                     |                     | -             | -       |
| Mean (95%CI)                                                      | 28.8 (21.8 to 35.9)                  | 30.0 (22.2 to 28.1) | -1.2 (-11.7 to 9.3) |               |         |
| Median [IQR]                                                      | 21.0 [12.3 to 44.5]                  | 21.0 [11.5 to 43.0] |                     |               |         |
| Length of hospital stay <sup>□</sup> (days)                       |                                      |                     |                     | -             | -       |
| Mean (95%CI)                                                      | 52.2 (45.06)                         | 46.0 (32.12)        |                     |               |         |
| Median [IQR]                                                      | 34 [25-55]                           | 39 [23-56]          |                     |               |         |
| Curarisation (days)                                               |                                      |                     |                     |               |         |
| Median [IQR]                                                      | 7 [4 to 12]                          | 6 [3 to 14]         |                     | 2             | 4       |
| Mean (95% CI)                                                     | 9.5 (7.6 to 11.4)                    | 9.2 (7.2 to 11.1)   | 0.3 (-2.4 to 3.1)   |               |         |
| Time to first T-tube trial (days)                                 |                                      |                     |                     |               |         |
| Median [IQR]                                                      | 9 [3 to 14]                          | 9 [4-18]            | -1 [-5 to 2]        | 0             | 0       |

334 <sup>□</sup>Only in survivors

335 WHO World Health Organisation; ECMO Extracorporeal Membrane Oxygenation, ICU Intensive Care Unit

336

337 **Table S3. Subgroups analysis**

338

|                                                     | <b>IVIG</b>          | <b>Placebo</b>       | <b>Difference or Odds Ratio</b> |
|-----------------------------------------------------|----------------------|----------------------|---------------------------------|
| <b>Time to randomization</b>                        |                      |                      |                                 |
| <b>Less than 12 hours</b>                           | pts. 23              | pts. 31              |                                 |
| Median Ventilation free days at 28 days (95% CI)    | 0.0<br>(0.0 to 13.0) | 0.0<br>(0.0 to 10.0) | 0.0 (0.0 to 0.0)                |
| Death at 28 days - n (%)                            | 11 (48)              | 7 (23)               | 3.14 (0.97 to 10.17)            |
| Death at 90 days - n (%)                            | 12 (52)              | 15 (48)              | 1.16 (0.40 to 3.43)             |
| <b>&gt;12 ≤24 hours</b>                             | pts. 23              | pts. 23              |                                 |
| Median Ventilation free days at 28 days (95% CI)    | 0.0 (0.0 to 10.0)    | 7.5 (0.0 to 20.0)    | 0.0 (-8.0 to 0.0)               |
| Death at 28 days - n (%)                            | 7 (30)               | 4 (17)               | 2.08 (0.51 to 8.40)             |
| Death at 90 days - n (%)                            | 7 (30)               | 4 (17)               | 2.08 (0.51 to 8.40)             |
| <b>&gt;24 ≤ 72 hours</b>                            | pts. 23              | pts. 23              |                                 |
| Median Ventilation free days at 28 days (95% CI)    | 5.0<br>(0.0 to 16.0) | 0.0<br>(0.0 to 6.0)  | 0.0 (0.0 to 5.0)                |
| Death at 28 days - n (%)                            | 6 (26)               | 9 (39)               | 0.55 (0.16 to 1.92)             |
| Death at 90 days - n (%)                            | 9 (39)               | 12 (52)              | 0.59 (0.18 to 1.90)             |
| <b>Age</b>                                          |                      |                      |                                 |
| <b>Age &lt; 65 years</b>                            | pts 31               | pts 28               |                                 |
| Median Ventilation free days at 28 days (95% CI)    | 6.5<br>(0.0 to 10.0) | 0.0<br>(0.0 to 11.0) | 0.0 (0.0 to 6.0)                |
| Death at 28 days - n (%)                            | 6 (19)               | 4 (14)               | 1.38 (0.35 to 5.52)             |
| Death at 90 days - n (%)                            | 8 (26)               | 6 (21)               | 1.22 (0.36 to 4.09)             |
| <b>Age ≥ 65 years</b>                               | pts. 38              | pts. 49              |                                 |
| Median Ventilation free days at 28 days (95% CI)    | 0.0 (0.0 to 0.0)     | 0.0 (0.0 to 8.0)     | 0.0 (0.0 to 0.00)               |
| Death at 28 days - n (%)                            | 18 (47)              | 16 (33)              | 1.86 (0.78 to 4.44)             |
| Death at 90 days - n (%)                            | 20 (53)              | 25 (51)              | 1.07 (0.46 to 2.49)             |
| <b>Patients alive at day seven</b>                  | pts. 61              | pts. 69              |                                 |
| Median Ventilation free days at 28 days (95% CI)    | 2.5<br>(0.0 to 10.0) | 0.0<br>(0.0 to 9.0)  | 0.0 (0.0 to 0.0)                |
| Death at 28 days - n (%)                            | 17 (28)              | 13 (19)              | 1.66 (0.73 to 3.77)             |
| Death at 90 days - n (%)                            | 21 (34)              | 24 (35)              | 0.98 (0.48 to 2.06)             |
| <b>BMI (kg/m 2 )</b>                                |                      |                      |                                 |
| <b>BMI (kg/m 2 ) ≥ 30</b>                           | pts 38               | pts 32               |                                 |
| Median Ventilation free days at 28 days (95% CI)    | 5.0<br>(0.0 to 13.0) | 0.0<br>(0.0 to 8.0)  | 0.0 (0.0 to 5.0)                |
| Death at 28 days - n (%)                            | 12 (32)              | 11 (32)              | 0.84 (0.31 to 2.29)             |
| Death at 90 days - n (%)                            | 14 (37)              | 14 (44)              | 0.71 (0.27 to 1.86)             |
| <b>BMI (kg/m 2 ) &lt;30</b>                         | pts 31               | pts 45               |                                 |
| Median Ventilation free days at 28 days (95% CI)    | 0.0 (0.0 to 7.0)     | 0.0 (0.0 to 9.0)     | 0.0 (-1.0 to 0.0)               |
| Death at 28 days - n (%)                            | 12 (39)              | 9 (20)               | 2.53 (0.90 to 7.06)             |
| Death at 90 days - n (%)                            | 14 (45)              | 17 (38)              | 1.36 (0.54 to 3.44)             |
| <b>Corticosteroids administration</b>               |                      |                      |                                 |
| <b>Patients who received corticosteroids</b>        | pts 49               | pts 55               |                                 |
| Median Ventilation free days at 28 days (95% CI)    | 0.0 (0.0 to 8.0)     | 0.0 (0.0 to 8.0)     | 0.0 (0.0 to 0.0)                |
| Death at 28 days - n (%)                            | 14 (29)              | 11 (20)              | 1.60 (0.65 to 3.96)             |
| Death at 90 days - n (%)                            | 18 (37)              | 22 (40)              | 0.87 (0.39 to 1.92)             |
| <b>Patients who did not receive corticosteroids</b> | pts. 18              | pts. 21              |                                 |
| Median Ventilation free days at 28 days (95% CI)    | 0.0 (0.0 to 10.0)    | 0.0 (0.0 to 15.0)    | 0.0 (0.0 to 0.0)                |
| Death at 28 days - n (%)                            | 10 (56)              | 9 (43)               | 1.67 (0.47 to 5.93)             |
| Death at 90 days - n (%)                            | 10 (56)              | 9 (43)               | 1.67 (0.47 to 5.93)             |

339  
340

95% CI. 95% Confidence Interval ; BMI : Body Mass Index; pts : patients

341

342 **Table S4. Unplanned subgroups analysis**  
343

|                                                     | <b>IVIG</b>          | <b>Placebo</b>       | <b>Difference</b>                          | <b>p</b> |
|-----------------------------------------------------|----------------------|----------------------|--------------------------------------------|----------|
| <b>Per-protocol population*</b>                     | pts 40               | pts 46               |                                            |          |
| Ventilation free days at 28 days<br>Median (95% CI) | 0.0<br>(0.0 to 13.0) | 0.0<br>(0.0 to 15.0) | 0.0 (0.0 to 0.0)                           | 0.939    |
| Death at 28 days - n (%)                            | 15 (37.5)            | 13 (28.3)            | Odds Ratio (95% CI)<br>1.46 (0.59 to 3.61) | 0.408    |
| Death at 90 days - n (%)                            | 19 (47.5)            | 17 (37.0)            | Odds Ratio (95% CI)<br>1.47 (0.62 to 3.47) | 0.376    |

344 \* Per-protocol population was identified according to the following criteria:

- 345 – administered dose intensity =100% ±5%.  
346 – start of experimental treatment no later than the second day after randomization.

347

348

349

350 **Table S5: Treatment exposure**

351

|                                                                                                                                                | Intravenous<br>Immunoglobulins<br>(No. 66)*             | Placebo<br>(No. 73)**                                    |
|------------------------------------------------------------------------------------------------------------------------------------------------|---------------------------------------------------------|----------------------------------------------------------|
| Duration of treatment days***<br>Mean (95% CI)<br>Median [IQR]                                                                                 | 3.9 (3.8 to 4.0)<br>4.0 [4.0-4.0]                       | 4.0 (3.9 to 4.0)<br>4.0 [4.0-4.0]                        |
| Day from randomization to first administration - no. (%)****                                                                                   |                                                         |                                                          |
| First day                                                                                                                                      | 58 (95)                                                 | 62 (94)                                                  |
| Second Day                                                                                                                                     | -                                                       | 4 (6)                                                    |
| Third Day                                                                                                                                      | 2 (3)                                                   | -                                                        |
| Fourth Day                                                                                                                                     | -                                                       | -                                                        |
| Fifth Day                                                                                                                                      | 1 (2)                                                   | -                                                        |
| Missing data                                                                                                                                   | 5                                                       | 7                                                        |
| Cumulative dose ml<br>Mean (95%IC)<br>Median [IQR]                                                                                             | 3327 (3127-3527)<br>3400 [2800-4000]                    | 3304 (3172-3436)<br>3400 [2950-3630]                     |
| Dose intensity† (%)<br>Mean (95%IC)<br>Median [IQR]                                                                                            | 96.3 (92.1-1100.0)<br>100.0 [96.0-.100.0]               | 98.4 (95.0-100.0)<br>100.0 (97.0-100.0)                  |
| Patients with dose intensity below the dose defined as per protocol –<br>no. (%)<br>Mean dose intensity (95%IC)<br>Median dose intensity [IQR] | 26 (39.4)<br>84.3 (76.0-92.6)<br>93.2 [80.0-97.2]       | 16 (21.9)<br>85.1 (79.2-91.1)<br>89.2 [77.0-96.7]        |
| Patients with dose intensity more than as per protocol – no. (%)<br>Mean dose intensity (95%IC)<br>Median dose intensity [IQR]                 | 16 (24.2)<br>110.2 (105.1-115.4)<br>106.0 [102.1-116.2] | 22 (30.1)<br>110.09 (105.6-116.2)<br>104.6 [101.2-121.2] |

352

95% CI : 95% Confidence Interval; IQR : Interquartile Range

353

\* datas were missing for two patients; one additional patient withdrew its consent at day 3,

354

\*\* datas were. missing for three patients; one additional patient was lost to follow-up at day 0 (transferred at other hospital)

355

† Dose intensity =Total dose administered / Total dose defined per protocol (2g/Kg)

356

\*\*\* 8 pts. declare three days of treatment, for all the administered dose, is according to protocol, one patient was treated for three days dose administered 70% of that expected no adverse events reported

357

\*\*\*\* 4 pts start treatment at the second days after randomization, all of them in placebo group, for all the dose administered according to protocol; one patient was treated for three days dose administered 70% of that expected no adverse events reported; for five patients in IVIG group and, seven patients in the placebo group the treatment starting day was non available

358

One patient in IVIG group was not treated at day three, the total dose administered was 75% of that expected, no adverse events reported

359

One patient in placebo group stop treatment at day four for toxicity (serious adverse event reported: hypertension plus hyperkalemia treatment stopped)

360

361

362

363

364

365

366

367  
368

**Table S6. Intensive Care-related adverse events**

|                                    | Intravenous Immunoglobulins (No. 68)* | Placebo (No. 76)** |
|------------------------------------|---------------------------------------|--------------------|
| Ventilator-acquired pneumonia‡     | 32                                    | 43                 |
| Catheter-associated infections     | 10                                    | 8                  |
| Delirium                           | 11                                    | 10                 |
| Gastro-intestinal hemorrhage       | 1                                     | 3                  |
| Decubitus pressure sore(> grade 2) | 1                                     | 4                  |
| Focal neurological deficit         | 2                                     | 2                  |
| Toxidermia                         | -                                     | 1                  |

369  
370  
371  
372  
373  
374

\* One patient in intravenous immunoglobulins group withdrawal at three day  
\*\* One patient in placebo was lost at follow-up (transferred to another hospital at the randomization day)  
‡ Four patients in the intravenous immunoglobulins group and four patients in the placebo group had two episodes of ventilator acquired pneumonia; five patients in the placebo group had three episodes of ventilator acquired pneumonia  
Delirium was defined according to the Confusion Assessment Method for Intensive Care Unit, Ventilator acquired pneumonia was declared by investigators and had to be bacteriologically proven.

**Table S7. All serious adverse events**

|                                                       | <b>IVIG</b> | <b>Placebo</b> |
|-------------------------------------------------------|-------------|----------------|
| Septic shock                                          | 8           | 4              |
| Pneumonia                                             | 5           | 5              |
| Multiple organ dysfunction syndrome                   | 5           | 3              |
| Acute kidney injury                                   | 5           | 2              |
| Pneumonia bacterial                                   | 5           | 1              |
| Pulmonary embolism                                    | 4           | 1              |
| Renal failure                                         | 2           | 2              |
| Anaemia                                               | 2           | 1              |
| Atrial fibrillation                                   | 2           | 1              |
| Deep vein thrombosis                                  | 0           | 2              |
| Hypertension                                          | 1           | 1              |
| Pseudomonal sepsis                                    | 2           | 0              |
| Pulmonary fibrosis                                    | 1           | 1              |
| Sepsis                                                | 1           | 1              |
| Shock haemorrhagic                                    | 1           | 1              |
| Venous thrombosis limb                                | 2           | 0              |
| Acute pulmonary oedema                                | 1           | 0              |
| Aplastic anaemia                                      | 1           | 0              |
| Aspergillus infection                                 | 1           | 0              |
| Atrioventricular block complete                       | 1           | 0              |
| Autoimmune haemolytic anaemia                         | 1           | 0              |
| Blood loss anaemia                                    | 0           | 1              |
| Bronchopulmonary aspergillosis                        | 1           | 0              |
| Candida sepsis                                        | 1           | 0              |
| Cardiac arrest                                        | 1           | 0              |
| Cardio-respiratory arrest                             | 1           | 0              |
| Cerebral infarction                                   | 1           | 0              |
| Cholangitis infective                                 | 1           | 0              |
| Coombs positive haemolytic anaemia                    | 1           | 0              |
| Decubitus ulcer                                       | 0           | 1              |
| Disturbance in attention                              | 1           | 0              |
| Drug reaction with eosinophilia and systemic symptoms | 1           | 0              |
| Duodenal ulcer haemorrhage                            | 1           | 0              |
| Encephalopathy                                        | 1           | 0              |
| Endotracheal intubation complication                  | 0           | 1              |
| Enterobacter pneumonia                                | 0           | 1              |
| Fluid overload                                        | 0           | 1              |
| Gastric ulcer                                         | 0           | 1              |
| Haematoma muscle                                      | 0           | 1              |
| Haemodilution                                         | 1           | 0              |
| Haemorrhagic stroke                                   | 0           | 1              |
| Haemothorax                                           | 1           | 0              |
| Herpes zoster                                         | 0           | 1              |
| Hyperkalaemia                                         | 0           | 1              |
| Hypokalaemia                                          | 1           | 0              |
| Hypoxia                                               | 0           | 1              |
| Intestinal ischaemia                                  | 1           | 0              |
| Ischaemic hepatitis                                   | 0           | 1              |
| Metabolic acidosis                                    | 1           | 0              |
| Metabolic encephalopathy                              | 1           | 0              |
| Myoclonus                                             | 1           | 0              |
| Nervous system disorder                               | 0           | 1              |
| Neuromyopathy                                         | 1           | 0              |
| Pneumomediastinum                                     | 1           | 0              |
| Pneumonia staphylococcal                              | 0           | 1              |
| Procedural pneumothorax                               | 1           | 0              |
| Pseudomonas bronchitis                                | 0           | 1              |
| Pulmonary haemorrhage                                 | 1           | 0              |

|                                         | <b>IVIG</b> | <b>Placebo</b> |
|-----------------------------------------|-------------|----------------|
| Pulmonary oedema                        | 0           | 1              |
| Renal impairment                        | 0           | 1              |
| Renal tubular necrosis                  | 0           | 1              |
| Respiratory tract infection             | 1           | 0              |
| Right ventricular failure               | 0           | 1              |
| Supraventricular tachycardia            | 1           | 0              |
| Systemic inflammatory response syndrome | 2           | 0              |
| Thrombocytopenia                        | 0           | 1              |
| Thrombosis                              | 1           | 0              |
| Urinary tract infection                 | 0           | 1              |
| Urosepsis                               | 1           | 0              |
| Total                                   | 78          | 47             |

378

379



380 **Table S8 Cytokines concentrations over time**

|                                              | Inclusion      |                | Day 7           |                 | Day 14         |                | Day 28        |               |
|----------------------------------------------|----------------|----------------|-----------------|-----------------|----------------|----------------|---------------|---------------|
|                                              | IVIG           | Placebo        | IVIG            | Placebo         | IVIG           | Placebo        | IVIG          | Placebo       |
| N° patients                                  | 21             | 14             | 26              | 19              | 19             | 19             | 13            | 16            |
| Interleukin 6 (pg/mL) <i>f</i>               | 9,3 (5,1-23,2) | 7,4 (3,3-31,7) | 23,3(10,5-49,2) | 16,3(3,6-50,4)  | 11,2(3,5-23,8) | 21,9(7,0-49,8) | 9,0(1,5-28,0) | 5,3(2,8-13,4) |
| N° patients                                  | 11             | 6              | 18              | 12              | 14             | 10             | 12            | 8             |
| Interleukin 13 (pg/mL) †                     | 3,2(1,1 - 6,3) | 2,8(2,4-4,6)   | 7,0 (5,7-8,4)   | 2,7(1,7-3,7)*** | 4,0(3,6-5,2)   | 3,2(1,8-4,1)   | 2,5(2,0-3,3)  | 3,0(2,2-4,0)  |
| N° patients                                  | 21             | 15             | 27              | 20              | 20             | 16             | 13            | 17            |
| Tumor necrosis factor-alpha (pg/mL) <i>f</i> | 1,4 (1,1-2,4)  | 1,4(1,0-2,0)   | 1,4(1,0-2,0)    | 1,7(1,1-2,3)    | 1,8(1,2-3,1)   | 1,5(1,3-2,2)   | 1,5(1,1-2,8)  | 2,0(1,4-3,8)  |

381 IVIG: Intravenous Immunoglobulins

382 *f* Analysis of variance for an effect of IVIG, p=Non Significant

383 †Two way analysis of variance p for treatment 0.0002, difference at day 7 p<0,0001

384

385

386 **Table S9 Proportion of circulating lymphocytes over time**

|                                                                                     | Inclusion  |            | Day 7      |            | Day 14     |            | Day 28    |             |
|-------------------------------------------------------------------------------------|------------|------------|------------|------------|------------|------------|-----------|-------------|
|                                                                                     | IVIG       | Placebo    | IVIG       | Placebo    | IVIG       | Placebo    | IVIG      | Placebo     |
| N° patients                                                                         | 16         | 8          | 21         | 13         | 14         | 12         | 9         | 6           |
| Percent of CD4 T cells among CD3 <sup>+</sup> TCRγδ <sup>-</sup> cells median±IQR Δ | 79 (64-87) | 78 (66-85) | 77 (68-86) | 81 (68-91) | 76(66-85)  | 75(67-92)  | 59(45-74) | 79(73-84)*  |
| Regulatory CD4 T cells median±IQR †                                                 | 6(4-77)    | 6(4-7)     | 6(4-7)     | 4(4-6)     | 6(4-10)    | 5(4-7)     | 6(5-7)    | 4(3-5)*     |
| Memory CD4 T cells median±IQR f                                                     | 50(44-56)  | 47(42-68)  | 60(44-64)  | 44(35-54)  | 56(47-6-8) | 45(37-67)  | 62(60-78) | 41(33-53)** |
| Naive CD4 T cells median±IQR ¥                                                      | 44(35-59)  | 46(27-54)  | 38(26-52)  | 51(39-62)  | 36(26-47)  | 49(29-60)  | 30(16-38) | 55(44-62)** |
| Percent of CD8 T cells among CD3 <sup>+</sup> TCRγδ <sup>-</sup> cells median±IQR Δ | 16(8-30)   | 17(12-31)  | 15(11-25)  | 17(7-26)   | 17(13-25)  | 18(7-26)   | 35(22-39) | 18(14-23)*  |
| Memory CD8 T cells median±IQR ff                                                    | 50(37-68)  | 34(26-59)  | 50(35-62)  | 34(23-48)  | 56(44-67)  | 36(28-55)* | 65(46-71) | 49(44-59)   |
| Naive CD8 T cells median±IQR ¥¥                                                     | 54(43-68)  | 67(42-76)  | 50(41-67)  | 67(54-78)  | 46(36-58)  | 65(47-74)  | 36(28-55) | 52(43-57)   |

387 IVIG : Intravenous Immunoglobulins ; CD Cluster of differenciation ;

388 \*p<0.05, \*\*p<0.01

389 Δ Analysis of variance for an effect of IVIG p=NS

390 † Two way analysis of variance p for treatment 0.015

391 f Two way analysis of variance p for treatment 0.006

392    ¥        Two way analysis of variance p for treatment 0.0016  
393    ¥¥        Two way analysis of variance p for treatment 0.0096  
394    *ff*        Two way analysis of variance p for treatment 0.006  
395

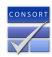
**CONSORT 2010 checklist of information to include when reporting a randomised trial\***

| Section/Topic                                                    | Item No | Checklist item                                                                                                                                                                              | Reported on page No         |
|------------------------------------------------------------------|---------|---------------------------------------------------------------------------------------------------------------------------------------------------------------------------------------------|-----------------------------|
| <b>Title and abstract</b>                                        | 1a      | Identification as a randomised trial in the title                                                                                                                                           | 1                           |
|                                                                  | 1b      | Structured summary of trial design, methods, results, and conclusions (for specific guidance see CONSORT for abstracts)                                                                     | 3                           |
| <b>Introduction</b>                                              |         |                                                                                                                                                                                             |                             |
| Background and objectives                                        | 2a      | Scientific background and explanation of rationale                                                                                                                                          | 5                           |
|                                                                  | 2b      | Specific objectives or hypotheses                                                                                                                                                           | 6                           |
| <b>Methods</b>                                                   |         |                                                                                                                                                                                             |                             |
| Trial design                                                     | 3a      | Description of trial design (such as parallel, factorial) including allocation ratio                                                                                                        | 7-8                         |
|                                                                  | 3b      | Important changes to methods after trial commencement (such as eligibility criteria), with reasons                                                                                          | 7                           |
| Participants                                                     | 4a      | Eligibility criteria for participants                                                                                                                                                       | 7-8                         |
|                                                                  | 4b      | Settings and locations where the data were collected                                                                                                                                        | 7                           |
| Interventions                                                    | 5       | The interventions for each group with sufficient details to allow replication, including how and when they were actually administered                                                       | 9                           |
| Outcomes                                                         | 6a      | Completely defined pre-specified primary and secondary outcome measures, including how and when they were assessed                                                                          | 9                           |
|                                                                  | 6b      | Any changes to trial outcomes after the trial commenced, with reasons                                                                                                                       | NA                          |
| Sample size                                                      | 7a      | How sample size was determined                                                                                                                                                              | 10                          |
|                                                                  | 7b      | When applicable, explanation of any interim analyses and stopping guidelines                                                                                                                | 10                          |
| Randomisation:                                                   |         |                                                                                                                                                                                             |                             |
| Sequence generation                                              | 8a      | Method used to generate the random allocation sequence                                                                                                                                      | 8                           |
|                                                                  | 8b      | Type of randomisation; details of any restriction (such as blocking and block size)                                                                                                         | 9                           |
| Allocation concealment mechanism                                 | 9       | Mechanism used to implement the random allocation sequence (such as sequentially numbered containers), describing any steps taken to conceal the sequence until interventions were assigned | 9                           |
| Implementation                                                   | 10      | Who generated the random allocation sequence, who enrolled participants, and who assigned participants to interventions                                                                     | 9                           |
| Blinding                                                         | 11a     | If done, who was blinded after assignment to interventions (for example, participants, care providers, those                                                                                | 9                           |
| CONSORT 2010 checklist <span style="float: right;">Page 1</span> |         |                                                                                                                                                                                             |                             |
| Statistical methods                                              |         | assessing outcomes) and how                                                                                                                                                                 |                             |
|                                                                  | 11b     | If relevant, description of the similarity of interventions                                                                                                                                 | NA                          |
|                                                                  | 12a     | Statistical methods used to compare groups for primary and secondary outcomes                                                                                                               | 10                          |
|                                                                  | 12b     | Methods for additional analyses, such as subgroup analyses and adjusted analyses                                                                                                            | 11                          |
| <b>Results</b>                                                   |         |                                                                                                                                                                                             |                             |
| Participant flow (a diagram is strongly recommended)             | 13a     | For each group, the numbers of participants who were randomly assigned, received intended treatment, and were analysed for the primary outcome                                              | 12                          |
|                                                                  | 13b     | For each group, losses and exclusions after randomisation, together with reasons                                                                                                            | 12                          |
| Recruitment                                                      | 14a     | Dates defining the periods of recruitment and follow-up                                                                                                                                     | 12                          |
|                                                                  | 14b     | Why the trial ended or was stopped                                                                                                                                                          | 12                          |
| Baseline data                                                    | 15      | A table showing baseline demographic and clinical characteristics for each group                                                                                                            | 18 Table 1                  |
| Numbers analysed                                                 | 16      | For each group, number of participants (denominator) included in each analysis and whether the analysis was by original assigned groups                                                     | 20 Table 2                  |
| Outcomes and estimation                                          | 17a     | For each primary and secondary outcome, results for each group, and the estimated effect size and its precision (such as 95% confidence interval)                                           | 20 Table 2 and sup Table S2 |
|                                                                  | 17b     | For binary outcomes, presentation of both absolute and relative effect sizes is recommended                                                                                                 | 20 Table 2                  |
| Ancillary analyses                                               | 18      | Results of any other analyses performed, including subgroup analyses and adjusted analyses, distinguishing pre-specified from exploratory                                                   | 25 Figure 2 and Table S2    |
| Harms                                                            | 19      | All important harms or unintended effects in each group (for specific guidance see CONSORT for harms)                                                                                       | 22 Table 3 and Table S6     |
| <b>Discussion</b>                                                |         |                                                                                                                                                                                             |                             |
| Limitations                                                      | 20      | Trial limitations, addressing sources of potential bias, imprecision, and, if relevant, multiplicity of analyses                                                                            | 15                          |
| Generalisability                                                 | 21      | Generalisability (external validity, applicability) of the trial findings                                                                                                                   | 16                          |
| Interpretation                                                   | 22      | Interpretation consistent with results, balancing benefits and harms, and considering other relevant evidence                                                                               | 15-16                       |
| <b>Other information</b>                                         |         |                                                                                                                                                                                             |                             |
| Registration                                                     | 23      | Registration number and name of trial registry                                                                                                                                              | 11                          |
| Protocol                                                         | 24      | Where the full trial protocol can be accessed, if available                                                                                                                                 | NA                          |
| Funding                                                          | 25      | Sources of funding and other support (such as supply of drugs), role of funders                                                                                                             | 11                          |

399 **Appendix 4. Supplementary Figures**

400

401 **Figure S1. Cumulative inclusions by treatment group**

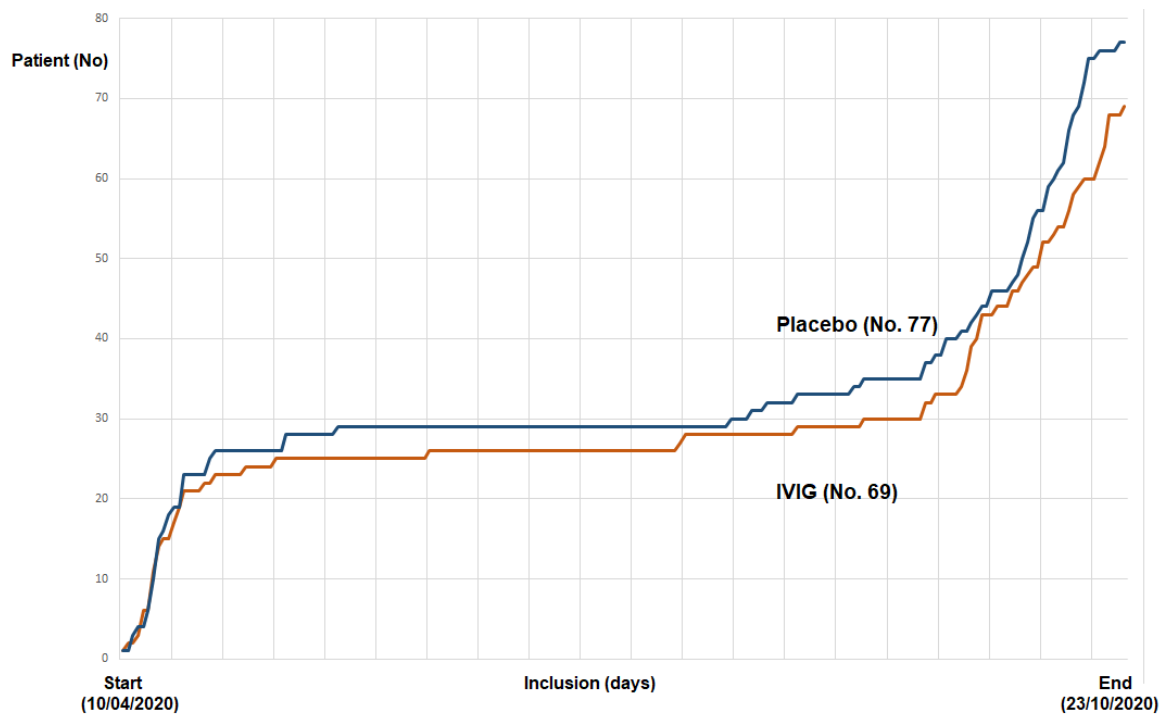

402

403 IVIG : Intravenous immunoglobulins. The two periods of inclusion are related to the “first  
404 wave” and “second wave” that occurred in France during the epidemics course.

405

406

407 **Figure S2. Ventilator-free days frequency distribution**

408

409

410

411

412

413

414

415

416

417

418

419

420

421

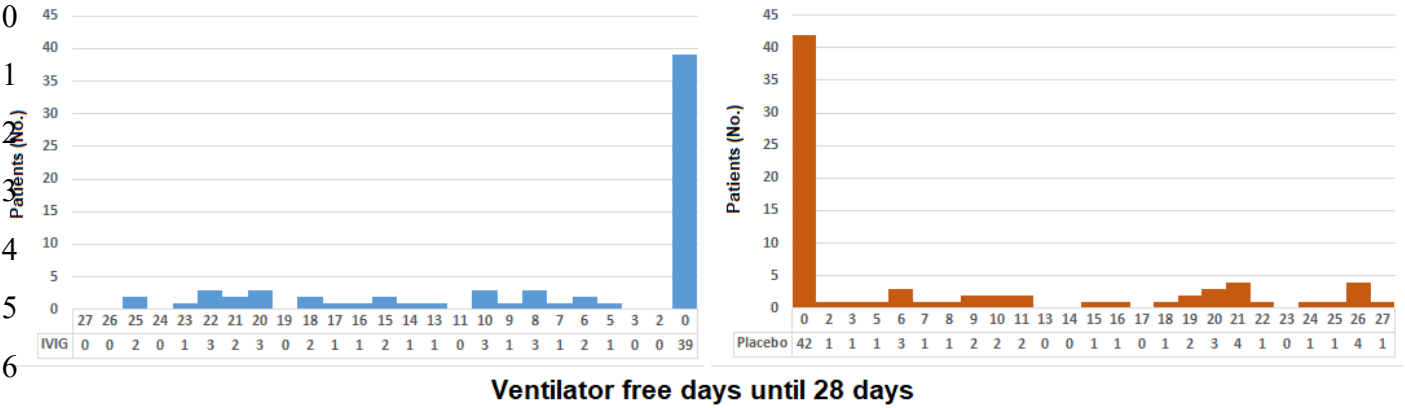

IVIG : Intravenous Immunoglobulins. Patients with prolonged mechanical ventilation during 28 days or more represent 15/39 in the intravenous immunoglobulins group and 22/42 in the placebo group.

422 **Figure S3. Survival at days 90\***

423

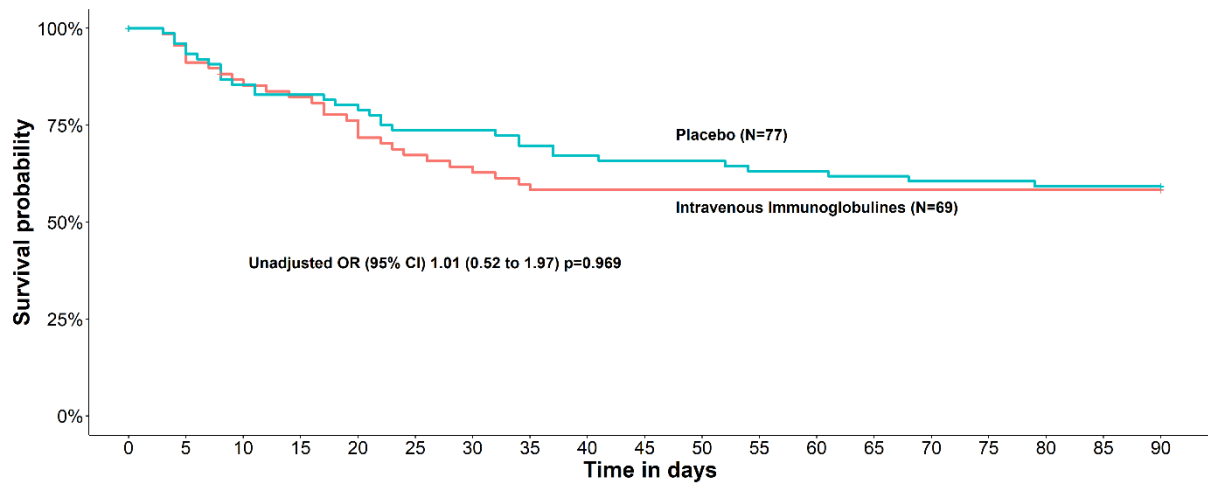

No. at risk

|         |    |    |    |    |    |    |    |    |    |    |    |    |    |    |    |    |    |    |
|---------|----|----|----|----|----|----|----|----|----|----|----|----|----|----|----|----|----|----|
| IVIG    | 69 | 65 | 58 | 55 | 51 | 45 | 43 | 40 | 39 | 39 | 39 | 39 | 39 | 39 | 39 | 39 | 39 | 39 |
| Placebo | 77 | 73 | 65 | 63 | 61 | 56 | 56 | 53 | 51 | 50 | 50 | 48 | 48 | 47 | 46 | 46 | 45 | 45 |

424

425 IVIG: Intravenous immunoglobulins; OR : Odds Ratio

426

427

428 **Figure S3. Unadjusted 28 days Odds Ratio: subgroup analysis**

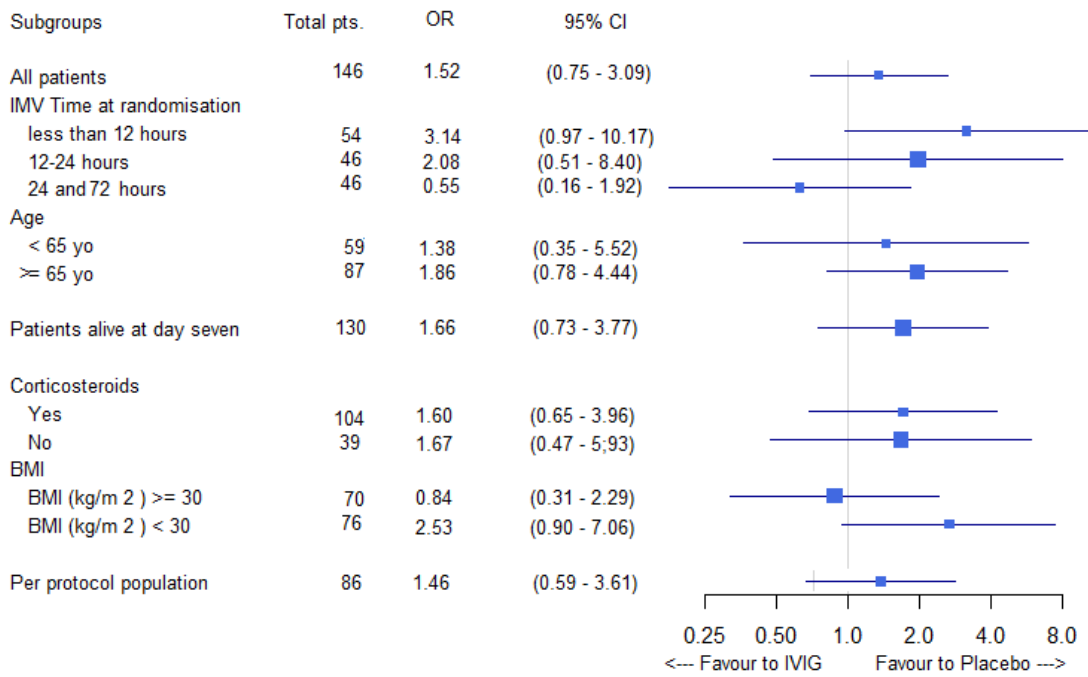

429

430 IMV: Invasive mechanical ventilation, BMI: Body Mass Index; yo : years old; pts: patients;  
 431 OR : Odds Ratio ; 95% CI : % Confidence Interval; IVIG : Intravenous Immunoglobulins.  
 432 For ORs, the interaction tested with the method proposed by Altman & Bland (5) did not  
 433 show statistical significance

434

435



436

437 **Figure S4. Unadjusted 90 days Odds Ratio: subgroup analysis**

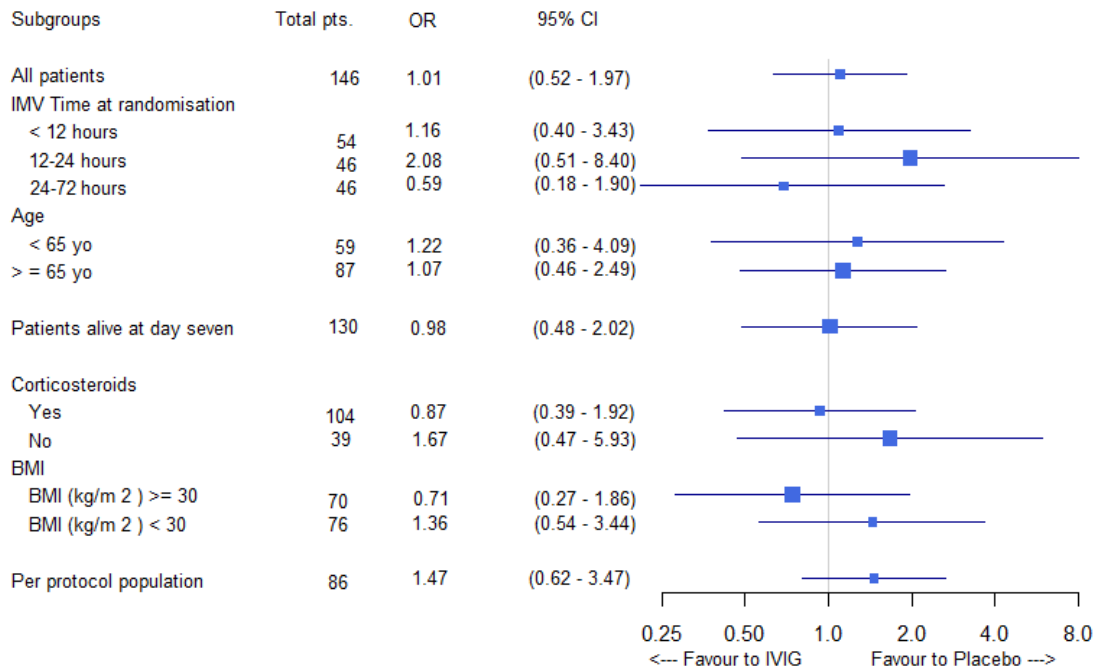

438

439

440 IMV: Invasive mechanical ventilation, BMI: Body Mass Index; yo : years old; pts: patients;  
 441 OR : Odds Ratio; 95% CI : % Confidence Interval; IVIG : Intravenous Immunoglobulins. For  
 442 ORs, the interaction tested with the method proposed by Altman & Bland (5) did not show  
 443 statistical significance

444

445

446

447

448

449

450

451

452

453

454

455

456  
 457  
 458  
 459  
 460  
 461

**Figure S5. Time to ICU discharge at 28 days (Cumulative incidence plots)**

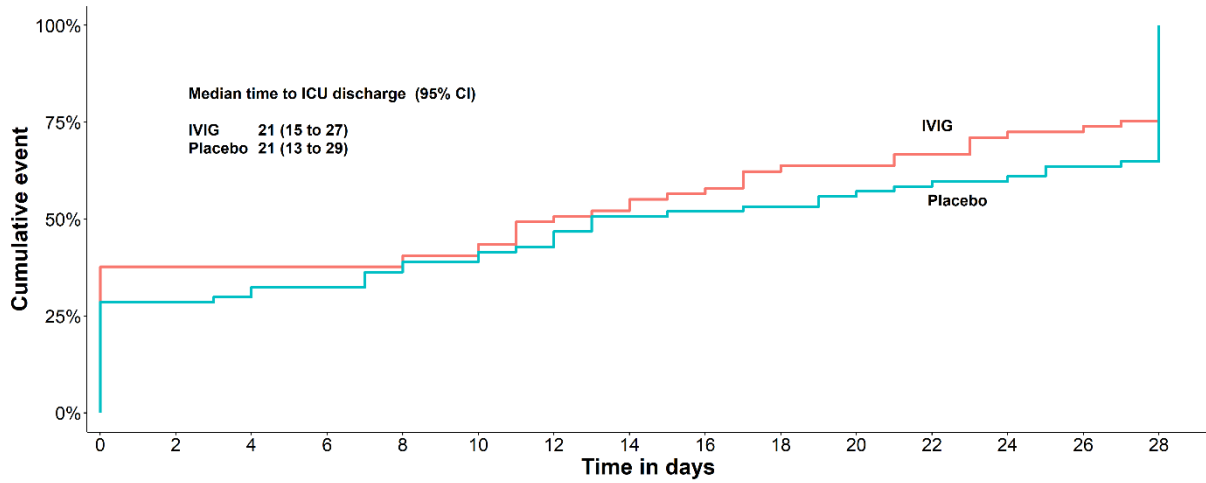

No. at risk

|         |    |    |    |    |    |    |    |    |    |    |    |    |    |    |    |
|---------|----|----|----|----|----|----|----|----|----|----|----|----|----|----|----|
| IVIG    | 69 | 43 | 43 | 43 | 43 | 41 | 35 | 33 | 30 | 26 | 25 | 23 | 20 | 19 | 17 |
| Placebo | 77 | 55 | 54 | 52 | 49 | 47 | 44 | 38 | 37 | 36 | 34 | 32 | 31 | 28 | 27 |

462  
 463  
 464

IVIG: Intravenous Immunoglobulins; ICU : Intensive Care Unit.

465

466 **Figure S6. Time to ICU discharge at 90 days (Cumulative incidence plots)**

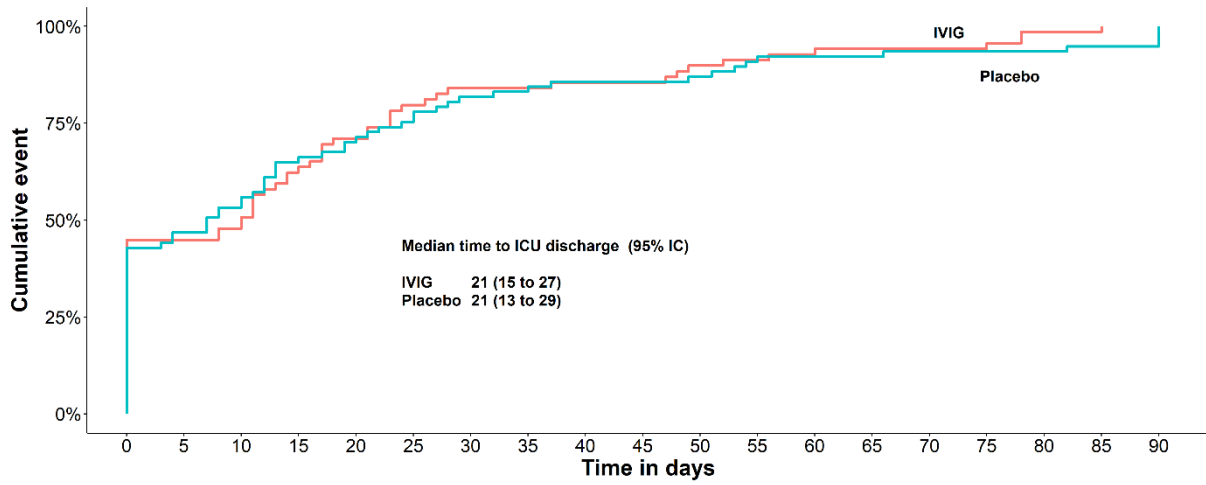

No. at risk

|         |    |    |    |    |    |    |    |    |    |    |    |   |   |   |   |   |   |   |   |
|---------|----|----|----|----|----|----|----|----|----|----|----|---|---|---|---|---|---|---|---|
| IVIG    | 69 | 38 | 36 | 26 | 20 | 14 | 11 | 11 | 10 | 10 | 7  | 6 | 5 | 4 | 4 | 4 | 1 | 1 | 0 |
| Placebo | 77 | 41 | 36 | 27 | 23 | 19 | 14 | 13 | 11 | 11 | 10 | 7 | 6 | 6 | 5 | 5 | 5 | 4 | 4 |

467

468 **IVIG: Intravenous Immunoglobulins; ICU : Intensive Care Unit.**

469

470

471

472 **Figure S7. Time to Hospital discharge at 90 days (Cumulative incidence plots)**

473

474

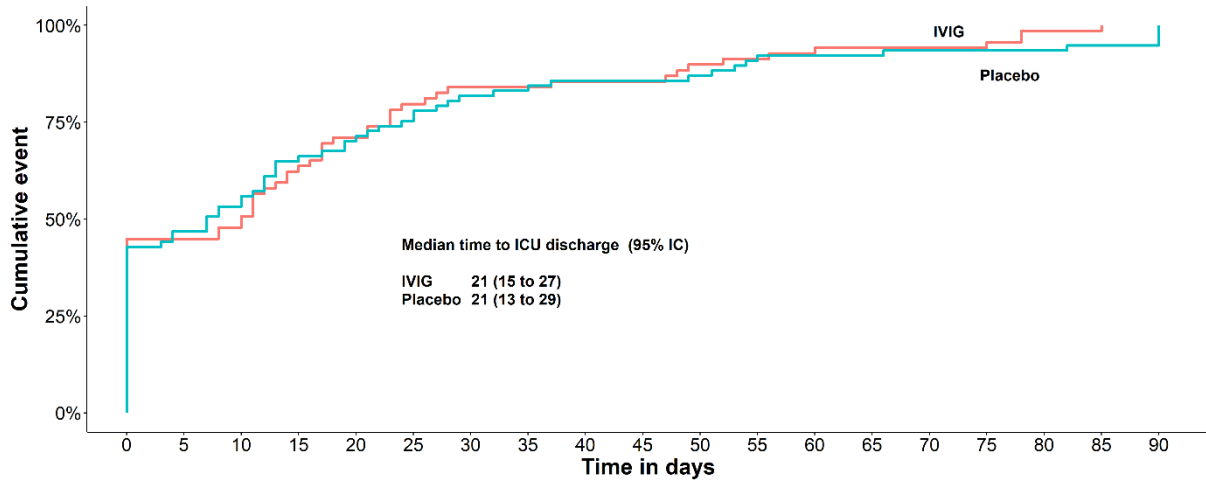

No. at risk

|         |    |    |    |    |    |    |    |    |    |    |    |   |   |   |   |   |   |   |   |
|---------|----|----|----|----|----|----|----|----|----|----|----|---|---|---|---|---|---|---|---|
| IVIG    | 69 | 38 | 36 | 26 | 20 | 14 | 11 | 11 | 10 | 10 | 7  | 6 | 5 | 4 | 4 | 4 | 1 | 1 | 0 |
| Placebo | 77 | 41 | 36 | 27 | 23 | 19 | 14 | 13 | 11 | 11 | 10 | 7 | 6 | 6 | 5 | 5 | 5 | 4 | 4 |

475

476 IVIG: Intravenous Immunoglobulins; ICU : Intensive Care Unit.

477

478 **Figure S8 : Plasma concentrations of inflammatory cytokines in a subset of patients.**

479

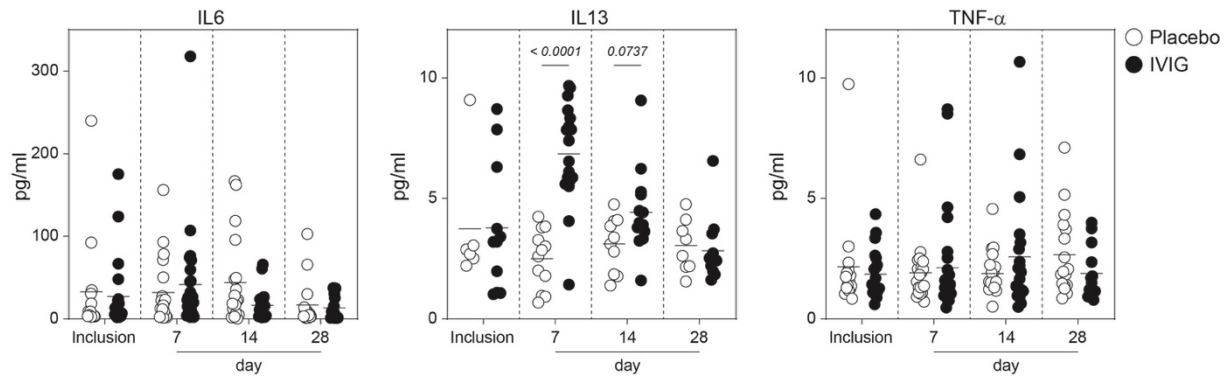

480

481 IL-6: Interleukin 6; IL13 : Interleukine 13; TNF-  $\alpha$ . Tumor necrosis Factor alpha ; IVIG  
482 Intravenous immunoglobulins. P values were calculated with a Mann-Whitney test

483

484 Patients' plasma was collected at the time of inclusion and 7, 14, and 28 days later. Plasma  
485 concentrations of interleukin-6, interleukin-13, and tumor necrosis factor were then quantified  
486 using multiplex cytokine immunoassay.

487

488  
489

**Figure S9: Characterization of blood T cells in a subset of patients.**

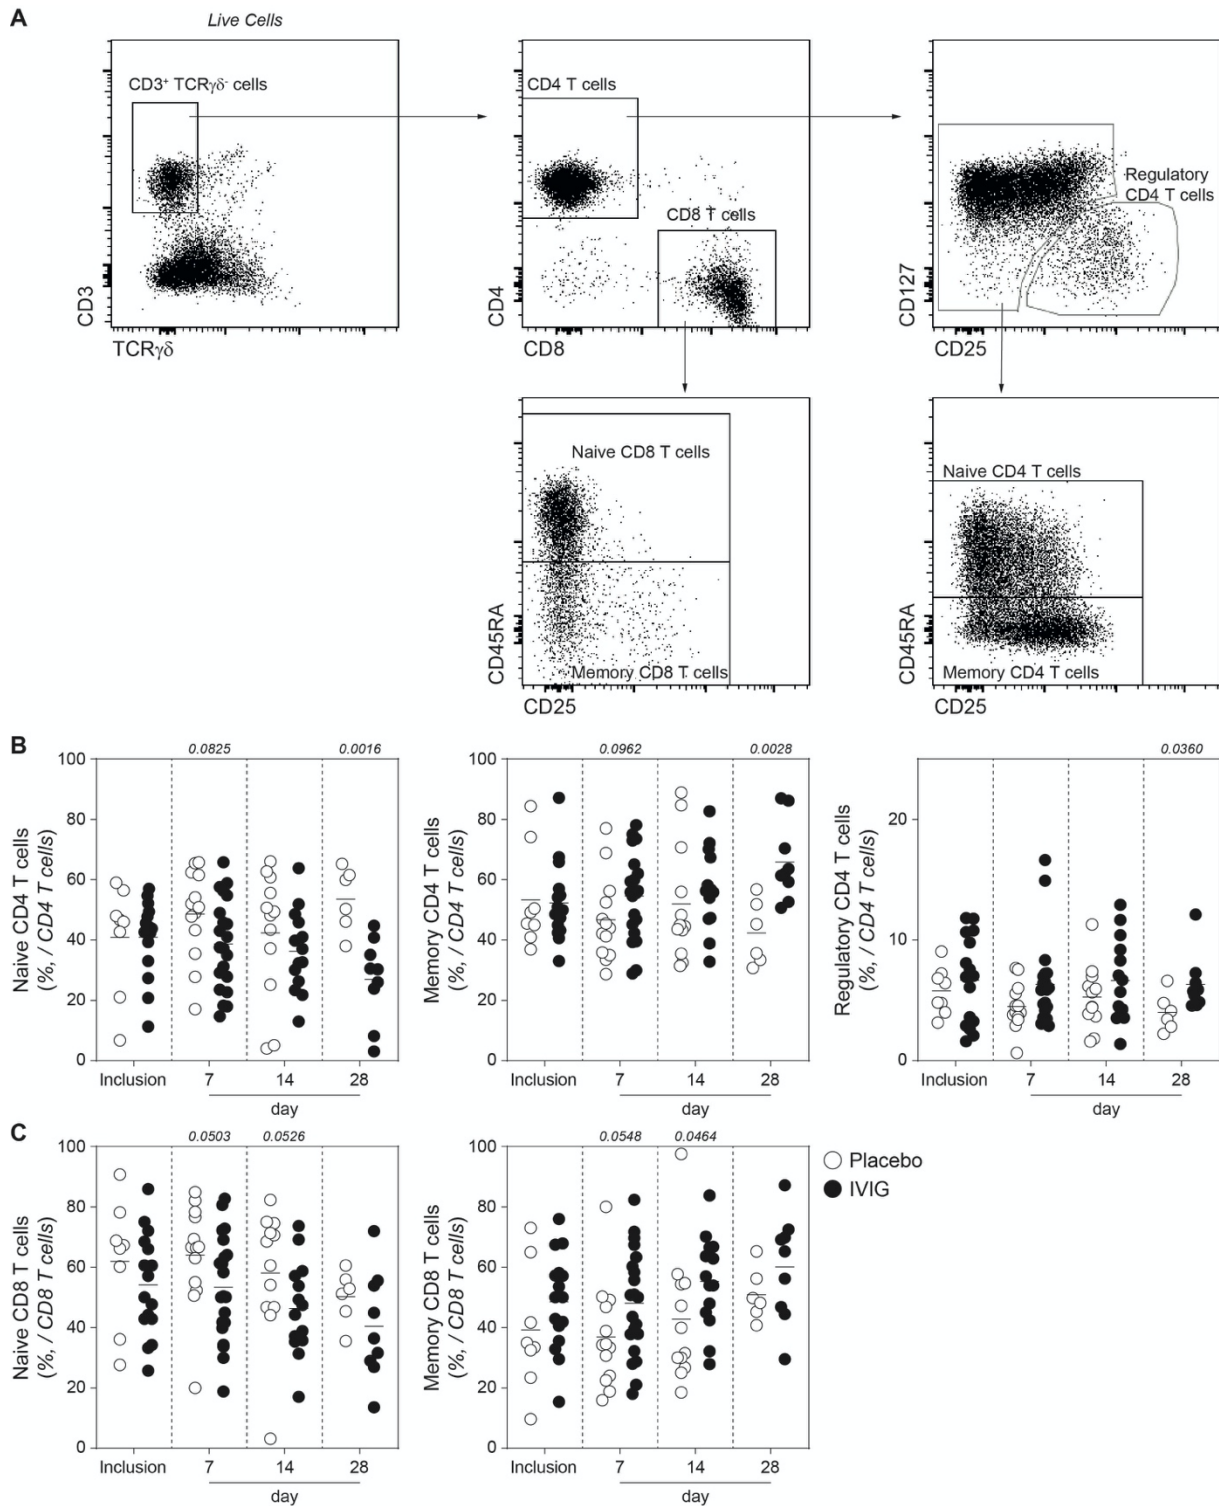

490

491 Peripheral blood from patients was collected at the time of inclusion and 7, 14, and 28 days  
492 later. Peripheral blood mononuclear cells were freshly purified on a Ficoll density gradient and  
493 then frozen in 10% dimethylsulfoxide / 90% fetal calf serum. A) Gating strategy used to define  
494 naive, memory and regulatory CD4 and CD8 T cells. B) Percentages of naive, memory and  
495 regulatory T cells among CD4 T cells. C) Percentages of naive and memory T cells among CD8  
496 T cells.

497 **References**

498

499 1. Yehya N, Harhay MO, Curley MAQ, Schoenfeld DA, Reeder RW. Reappraisal of  
500 Ventilator-Free Days in Critical Care Research. *Am J Respir Crit Care Med*. 2019 Apr  
501 29;200(7):828–36.

502 2. blockrand: Randomization for Block Random Clinical Trials [Internet]. Comprehensive R  
503 Archive Network (CRAN); [cited 2021 May 31]. Available from: [https://CRAN.R-](https://CRAN.R-project.org/package=blockrand)  
504 [project.org/package=blockrand](https://CRAN.R-project.org/package=blockrand)

505 3. Raith EP, Udy AA, Bailey M, McGloughlin S, MacIsaac C, Bellomo R, et al. Prognostic  
506 Accuracy of the SOFA Score, SIRS Criteria, and qSOFA Score for In-Hospital Mortality  
507 Among Adults With Suspected Infection Admitted to the Intensive Care Unit. *JAMA*. 2017  
508 Jan 17;317(3):290–300.

509 4. Atabai K, Matthay M. The pulmonary physician in critical care • 5: Acute lung injury and  
510 the acute respiratory distress syndrome: definitions and epidemiology. *Thorax*. 2002  
511 May;57(5):452–8.

512 5. **Altman DG, Bland JM. Interaction revisited: the difference between two estimates.**  
513 **BMJ. 2003 Jan 25;326(7382):219. doi: 10.1136/bmj.326.7382.219. PMID: 12543843;**  
514 **PMCID: PMC1125071.**

515

516
